# Supplementary material
Source: publisher figshare collection journal article supplement (https://diabetesjournals.figshare.com/articles/dataset/_/13229129)

Supplemental Figure 1

**A**

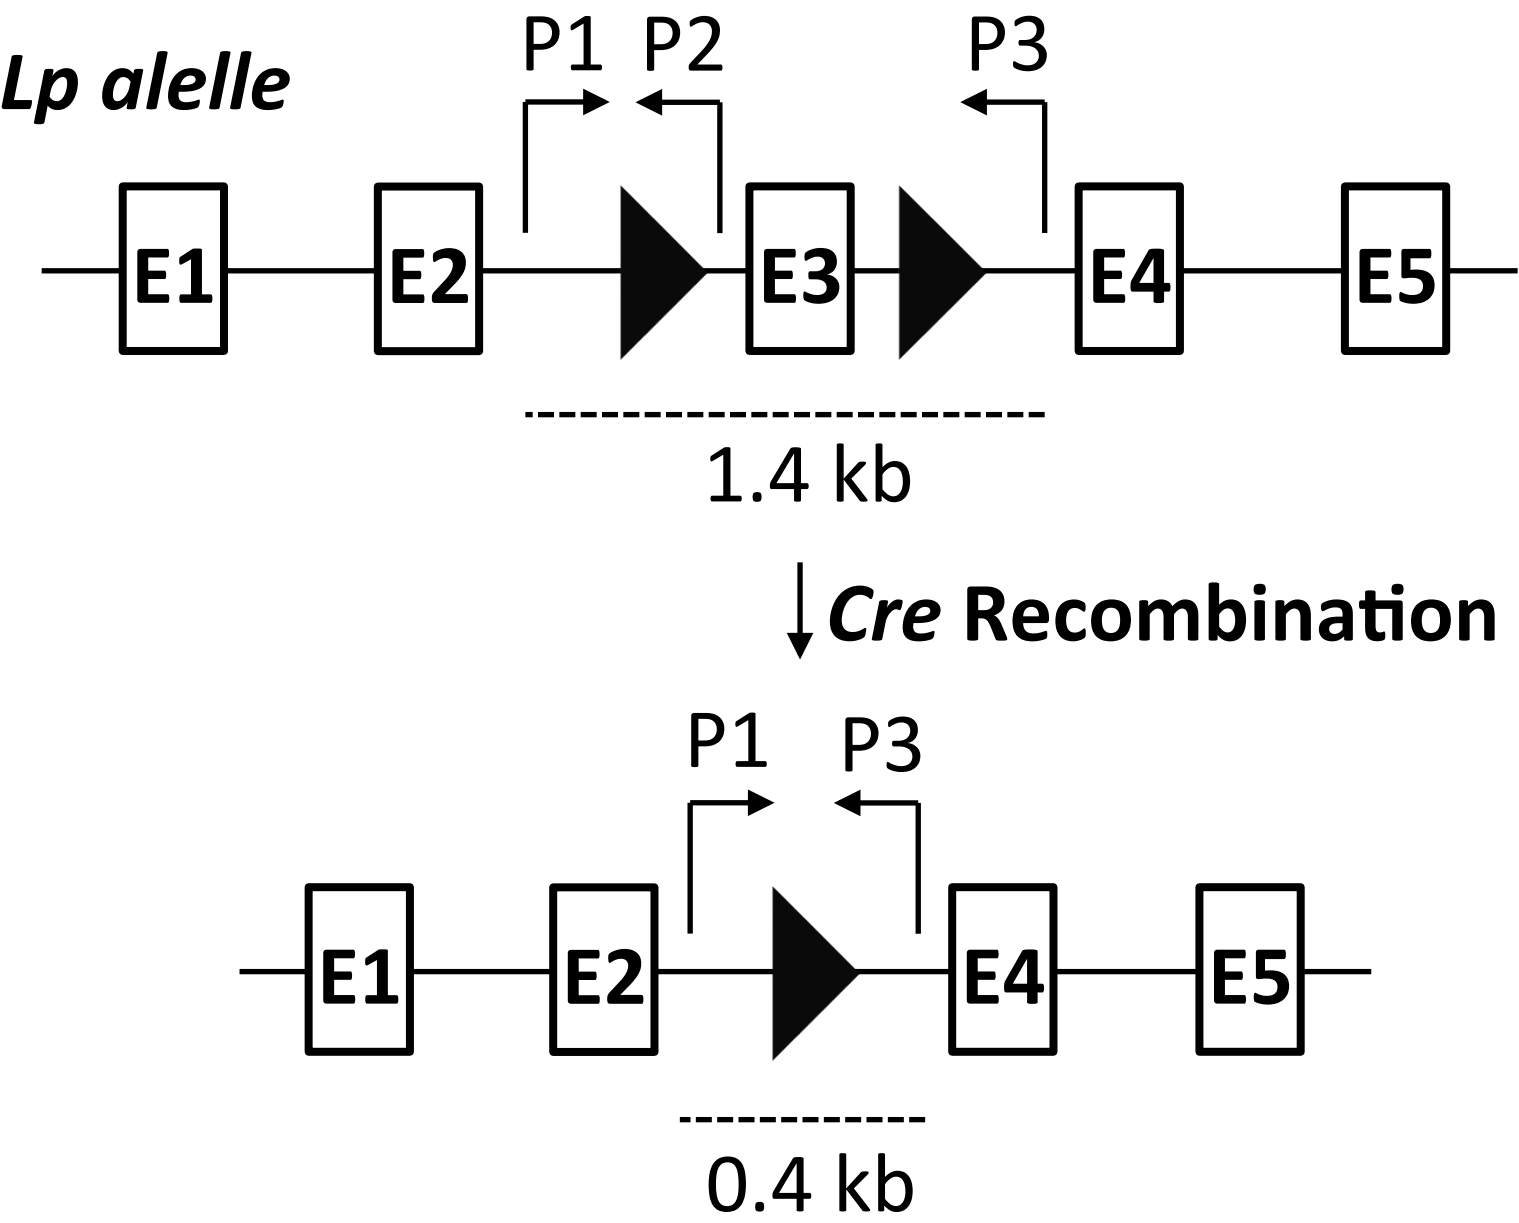

**B**

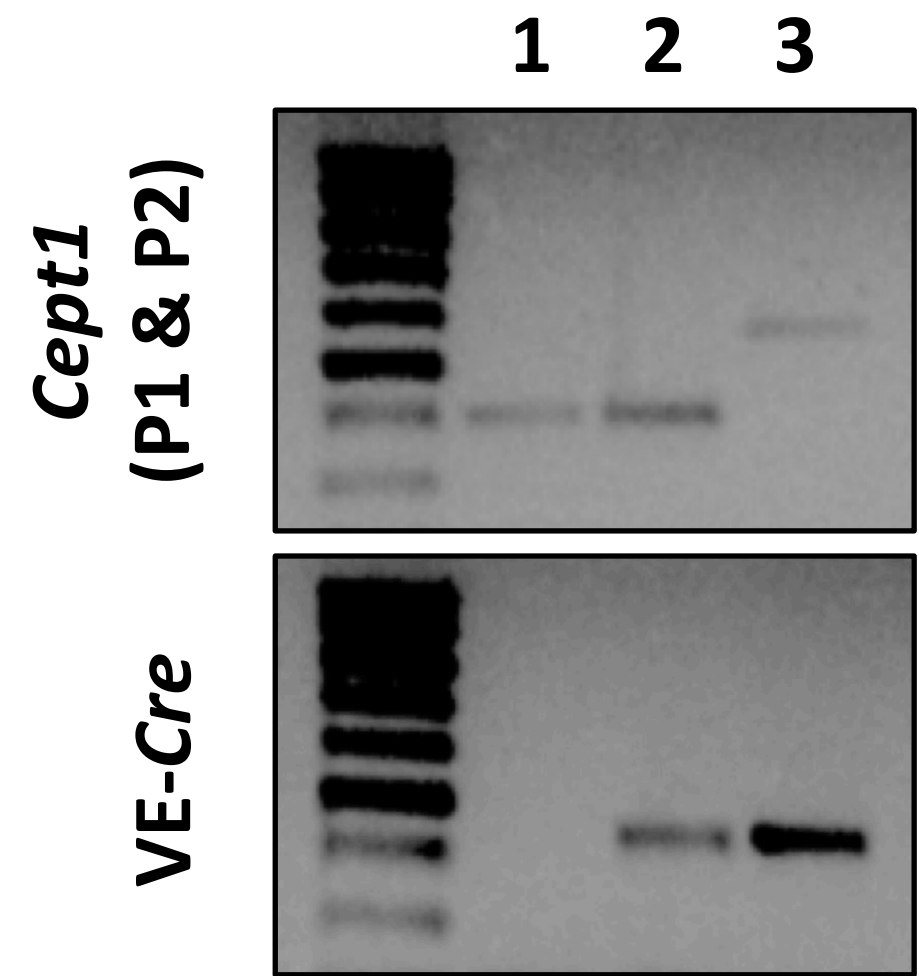

**C**

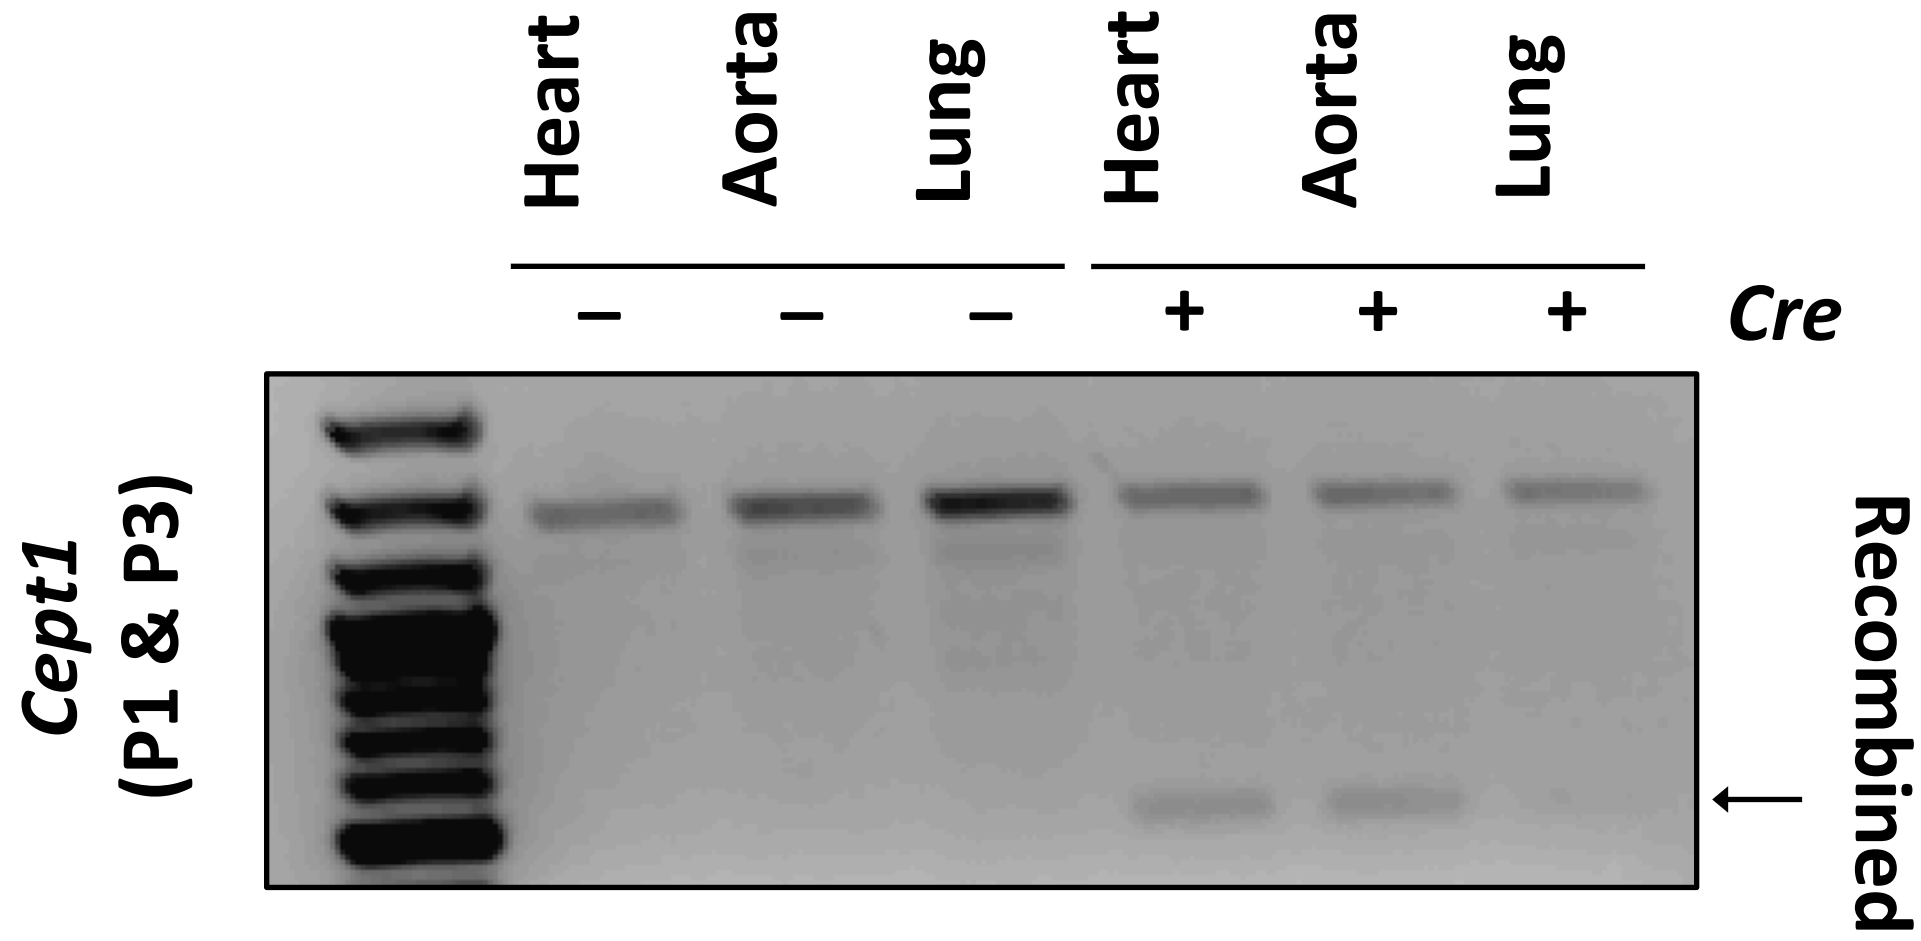

Supplemental Figure 2

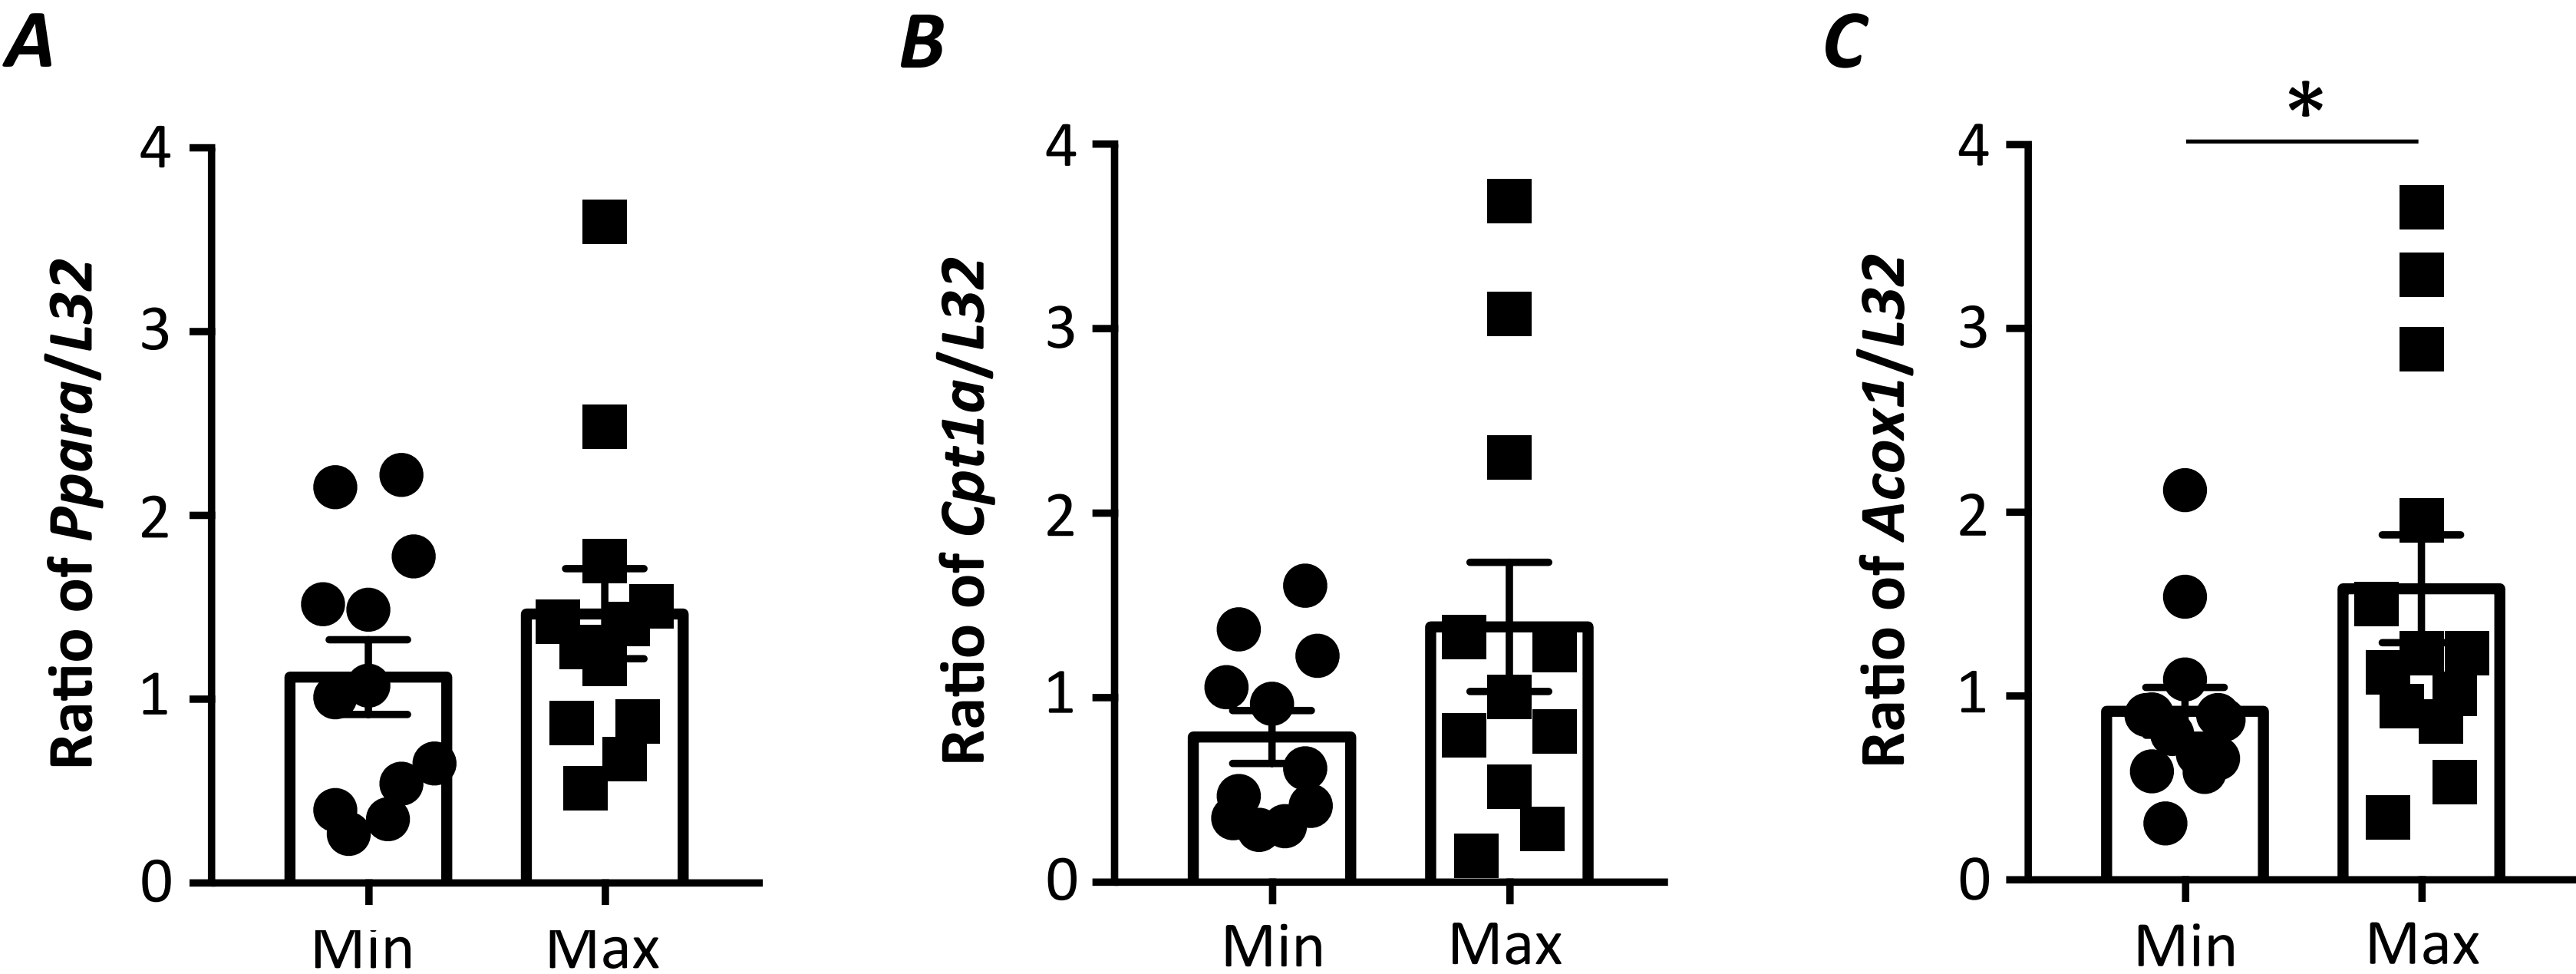

Supplemental Figure 3

**A**

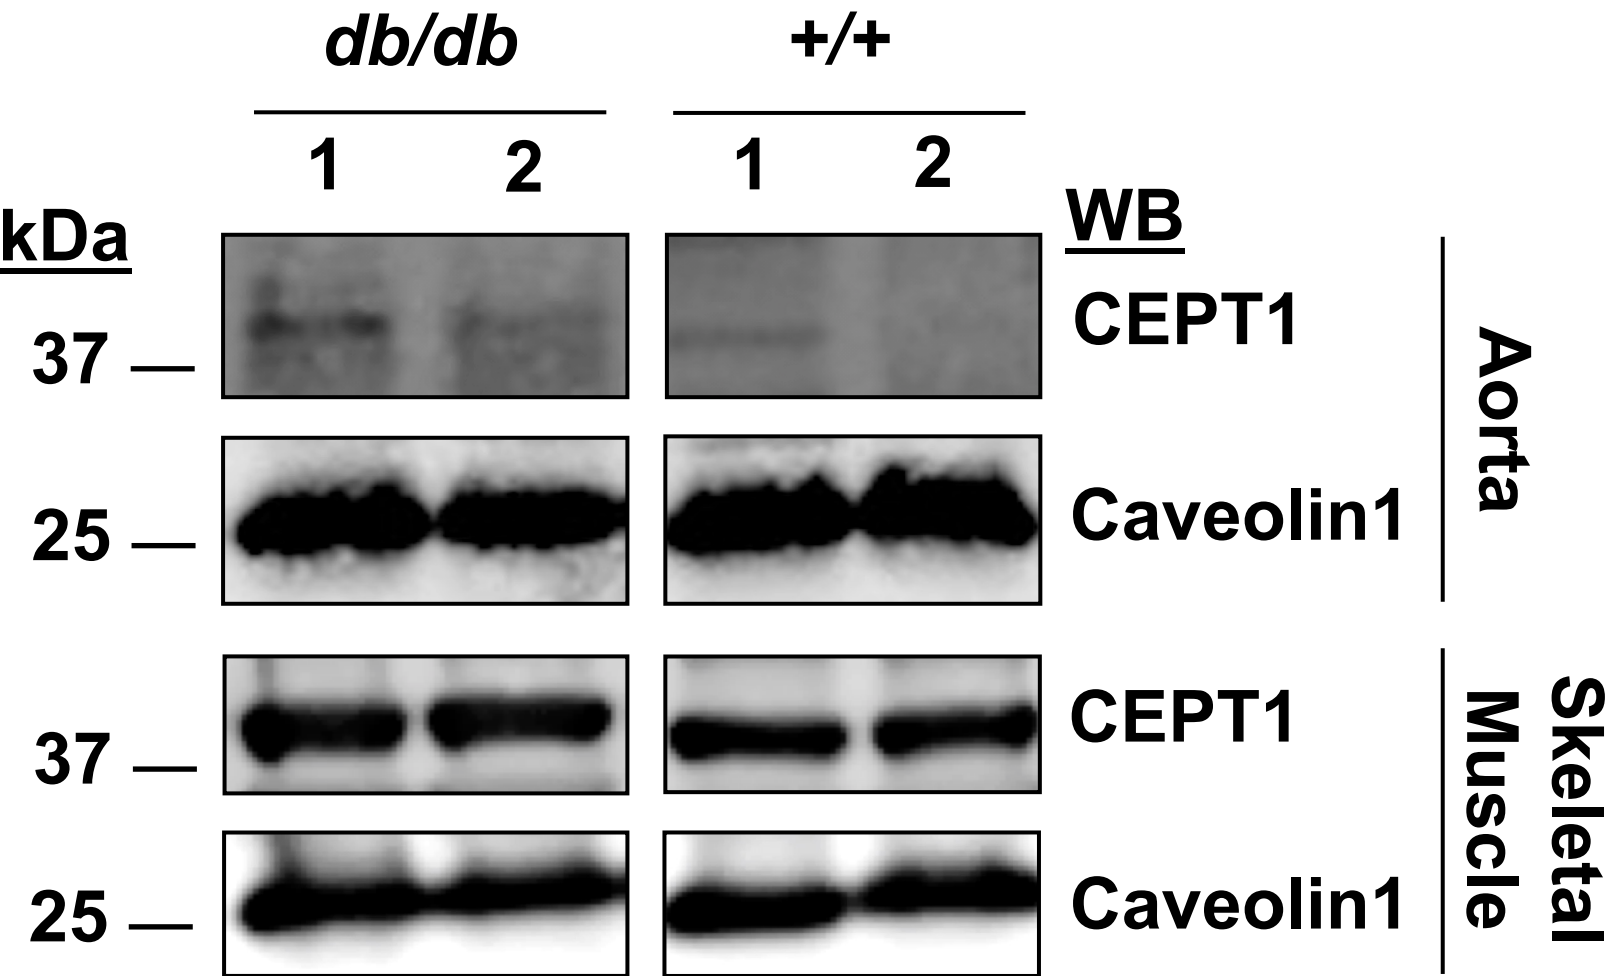

**B**

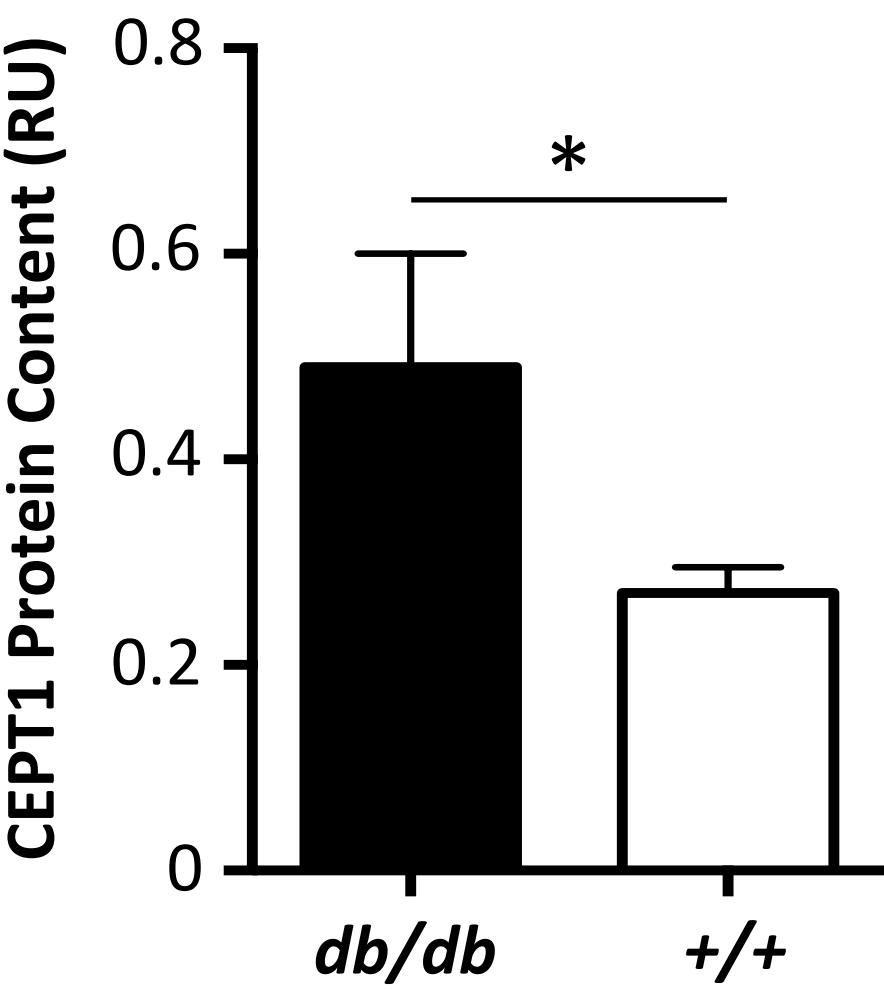

# Supplemental Figure 4

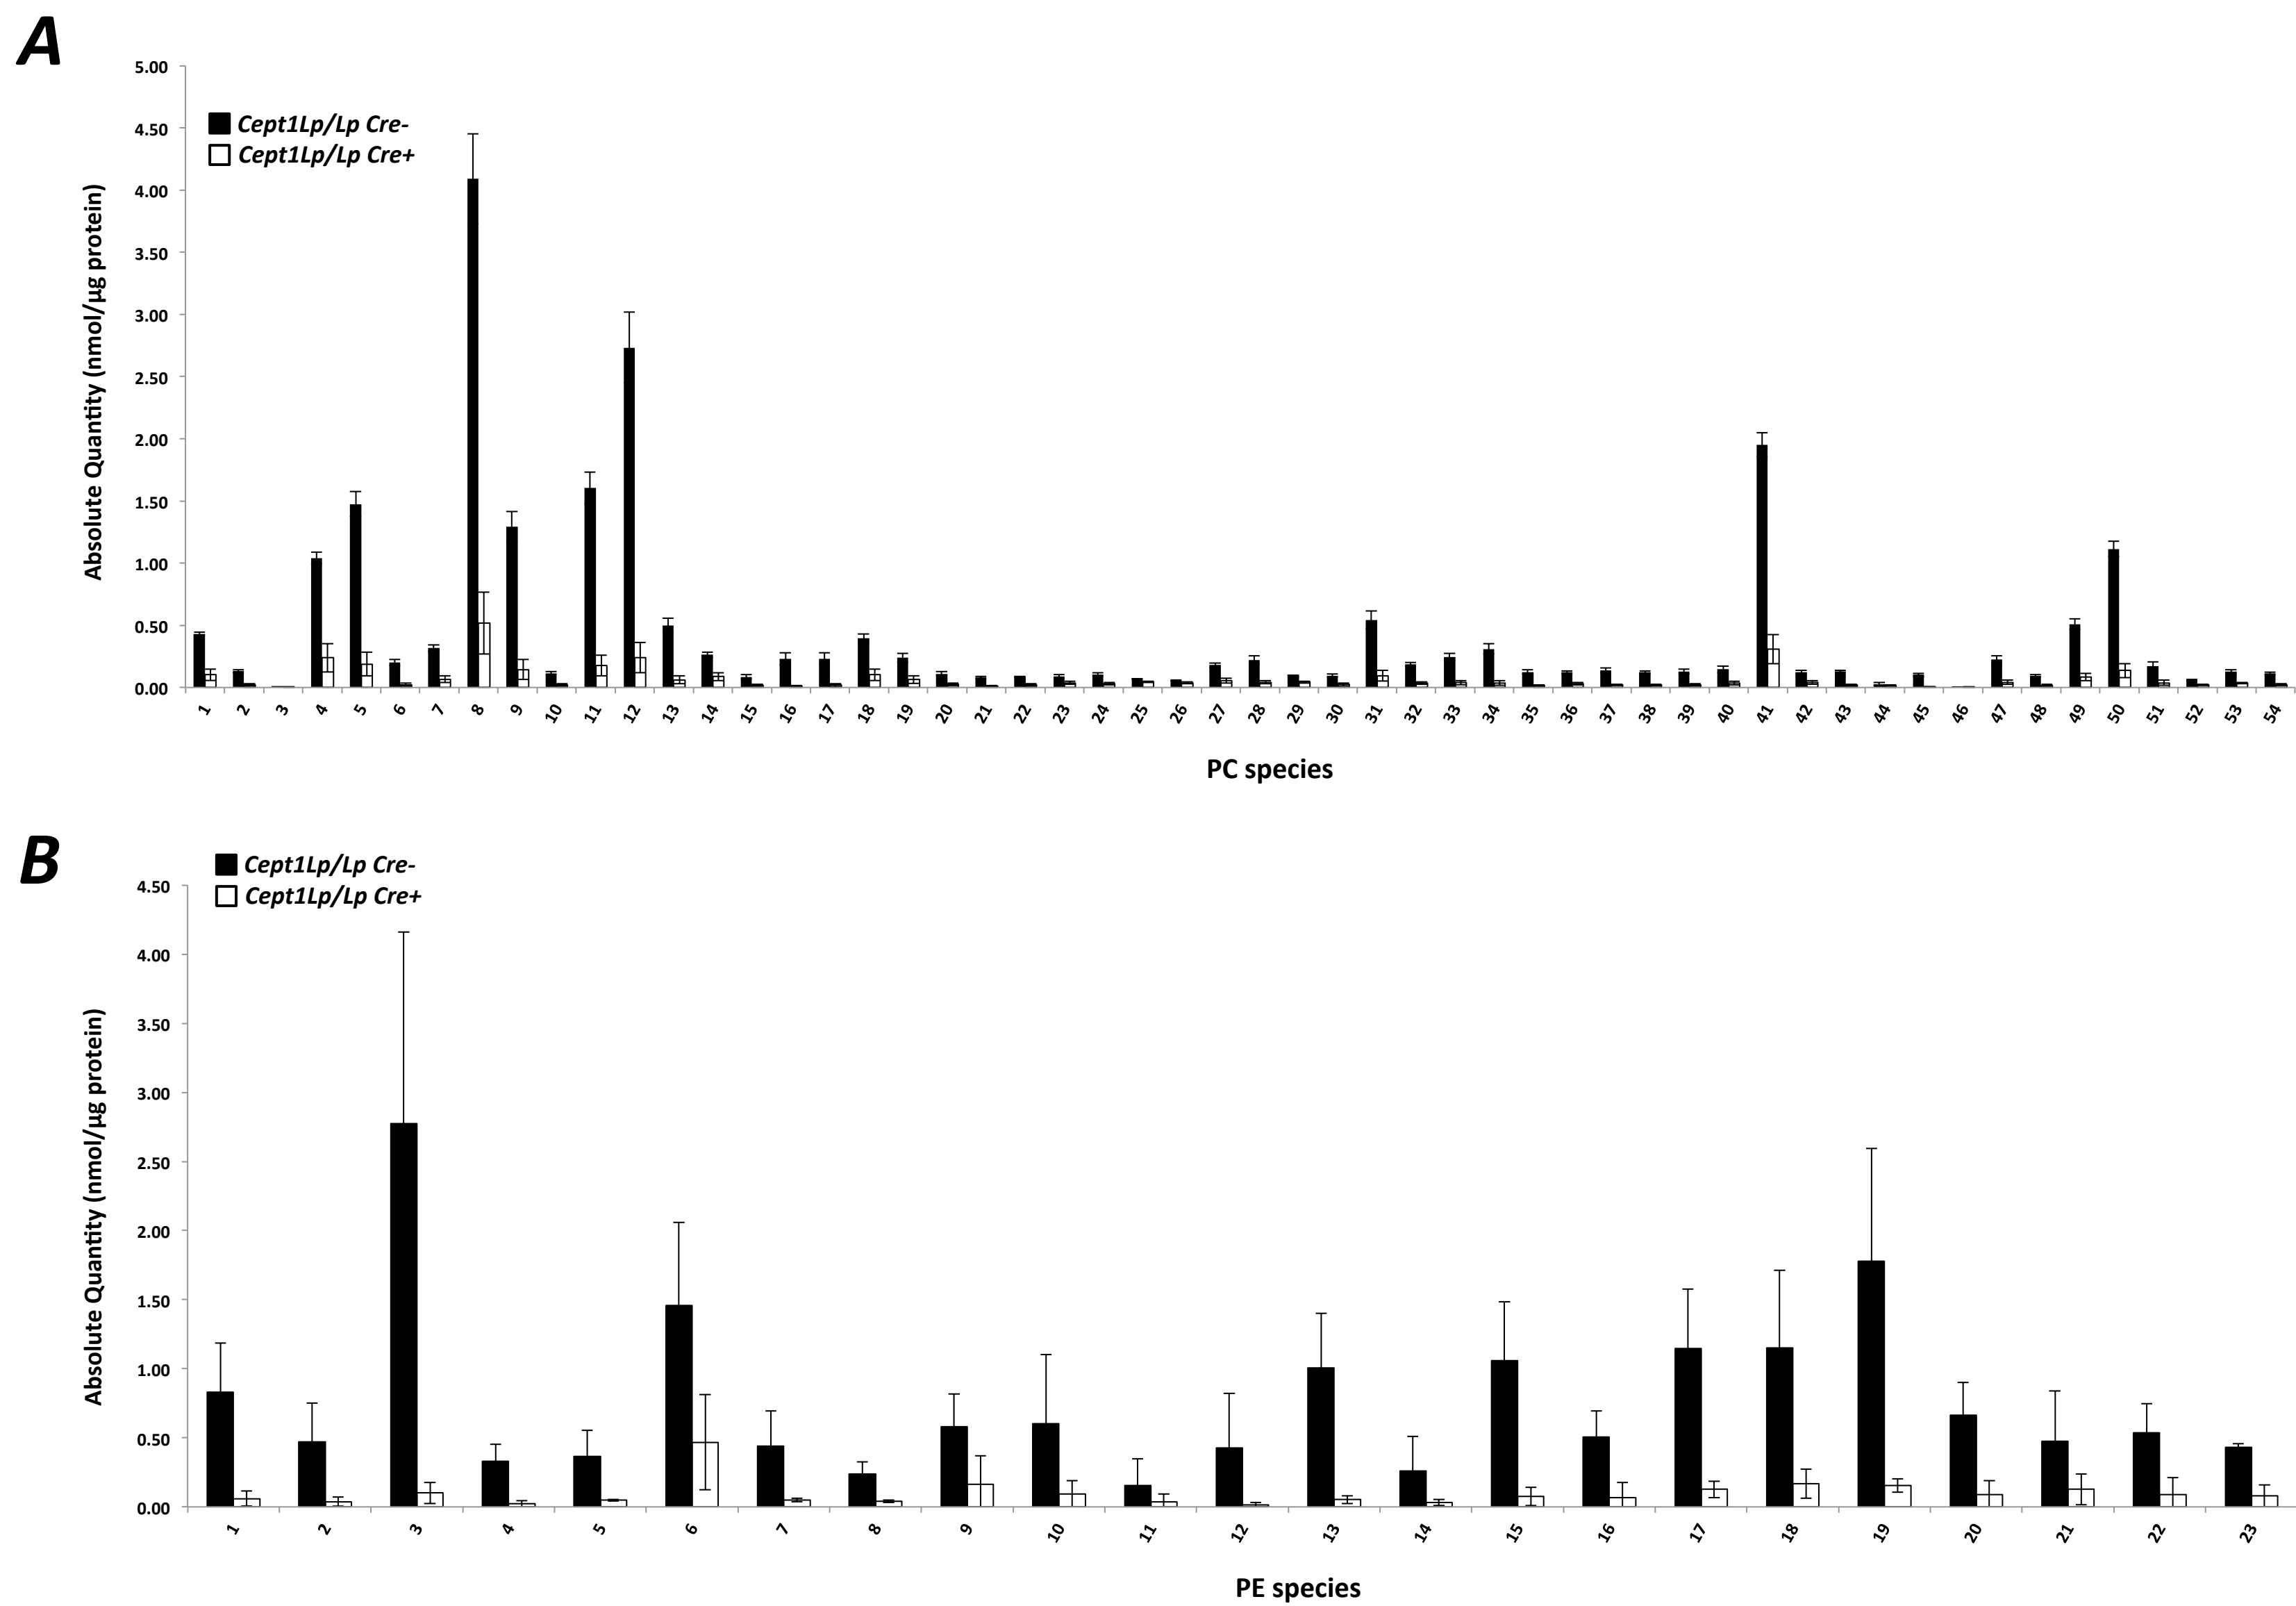



Supplemental Figure 5

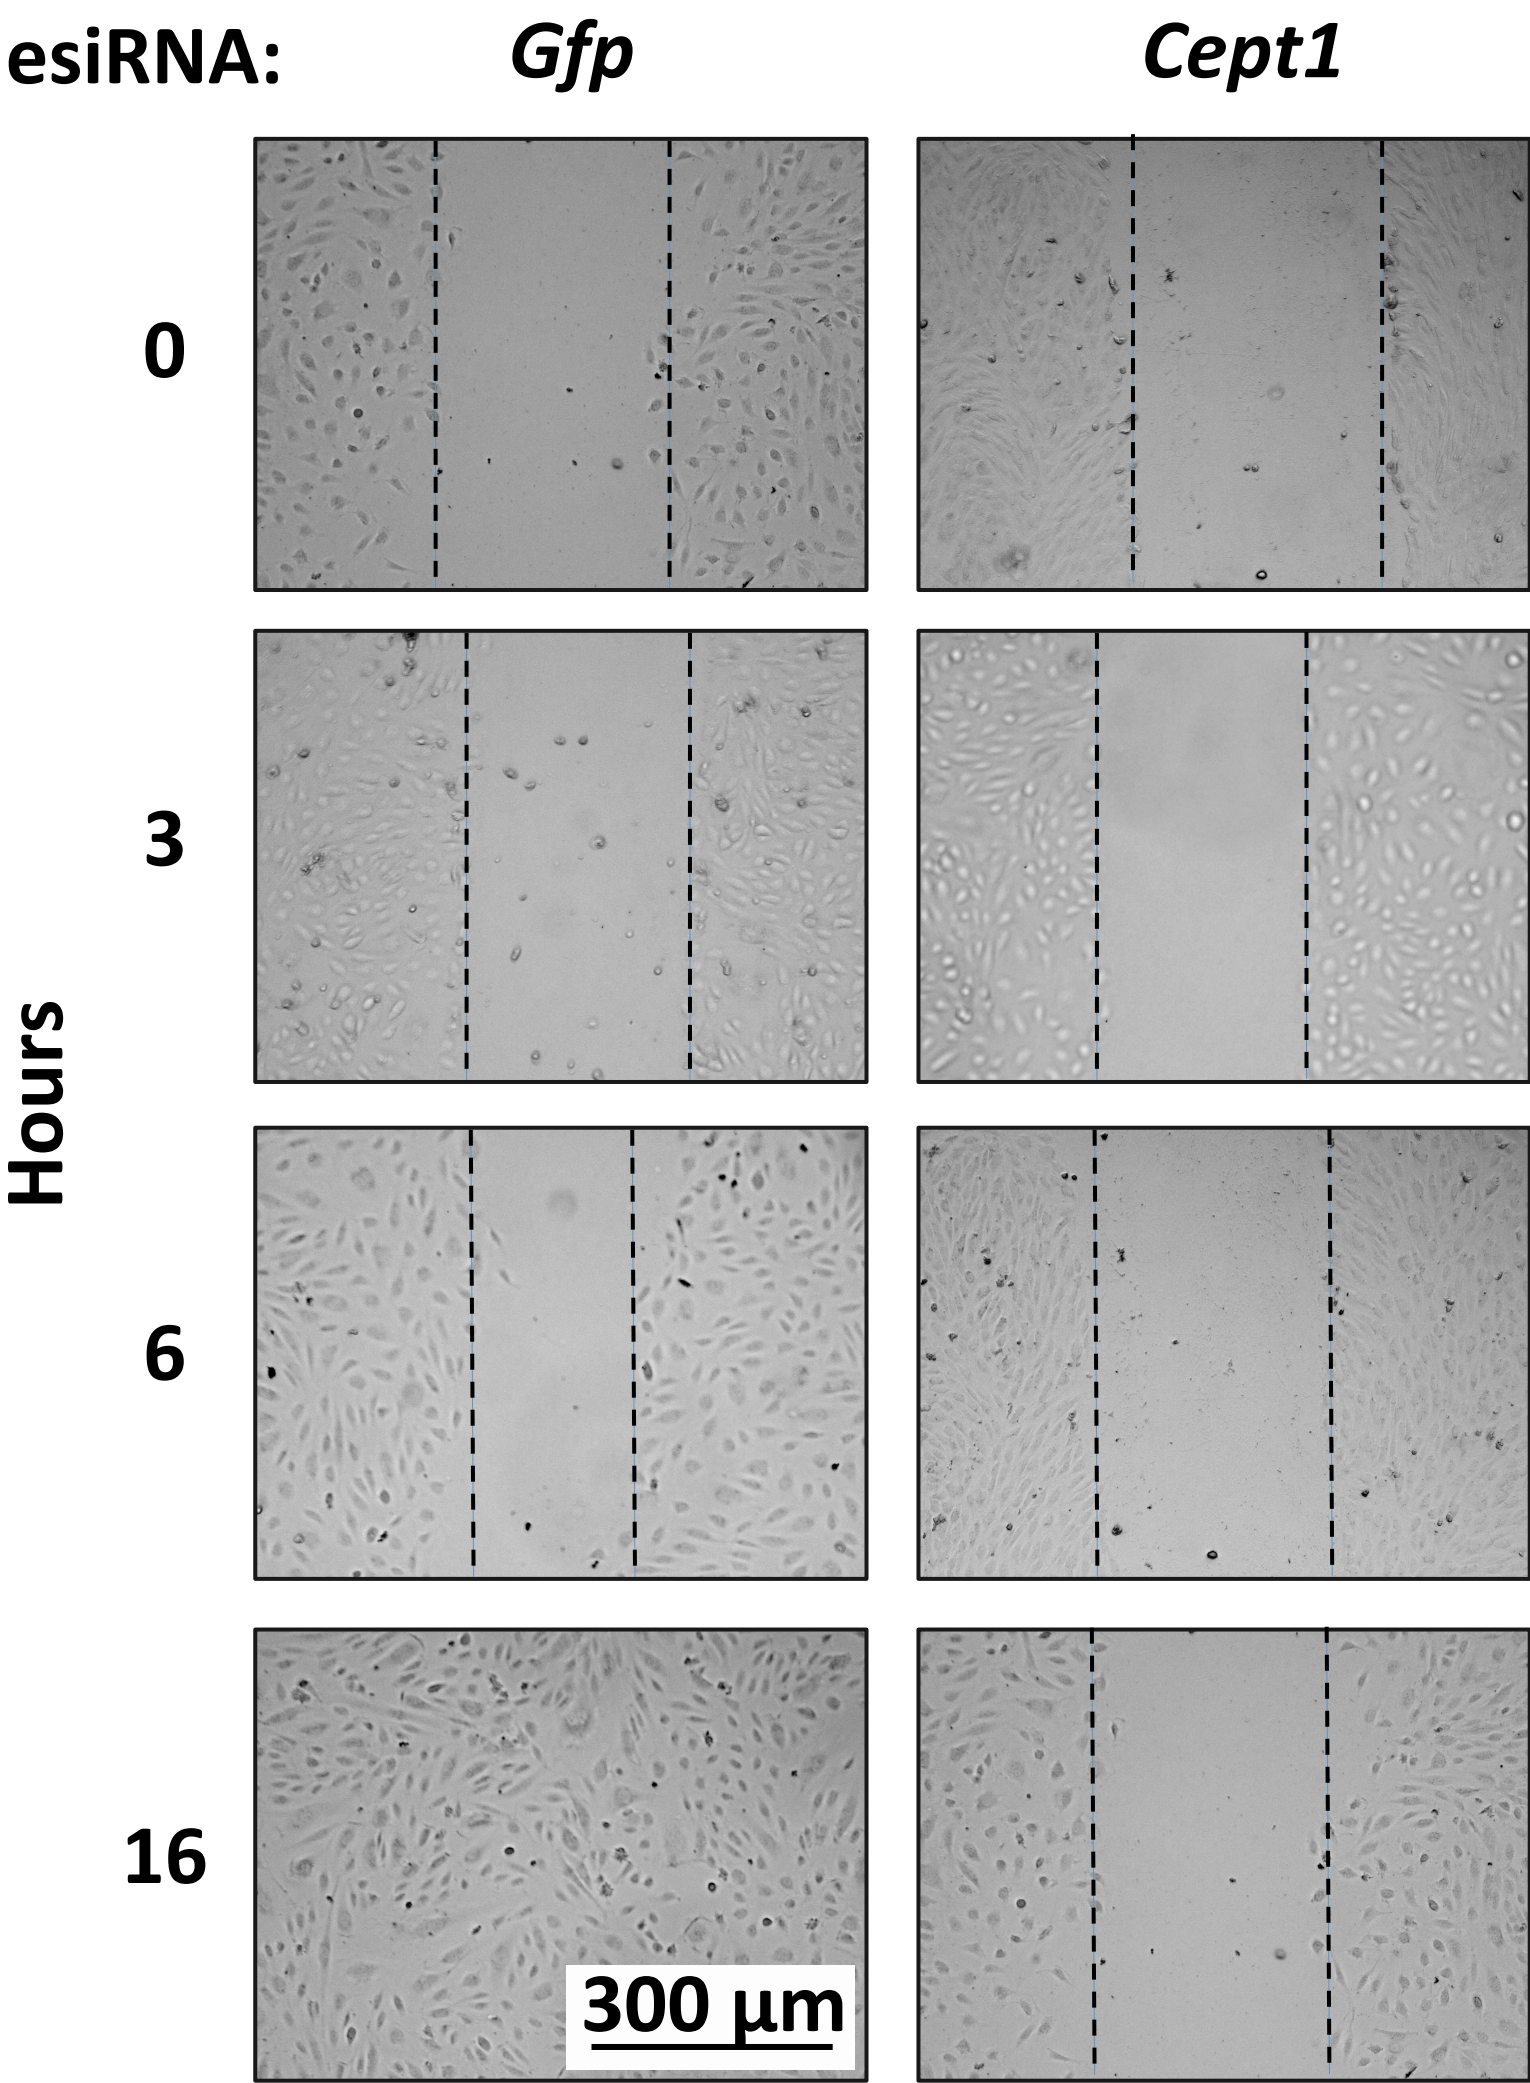

# Supplemental Figure 6

**A**

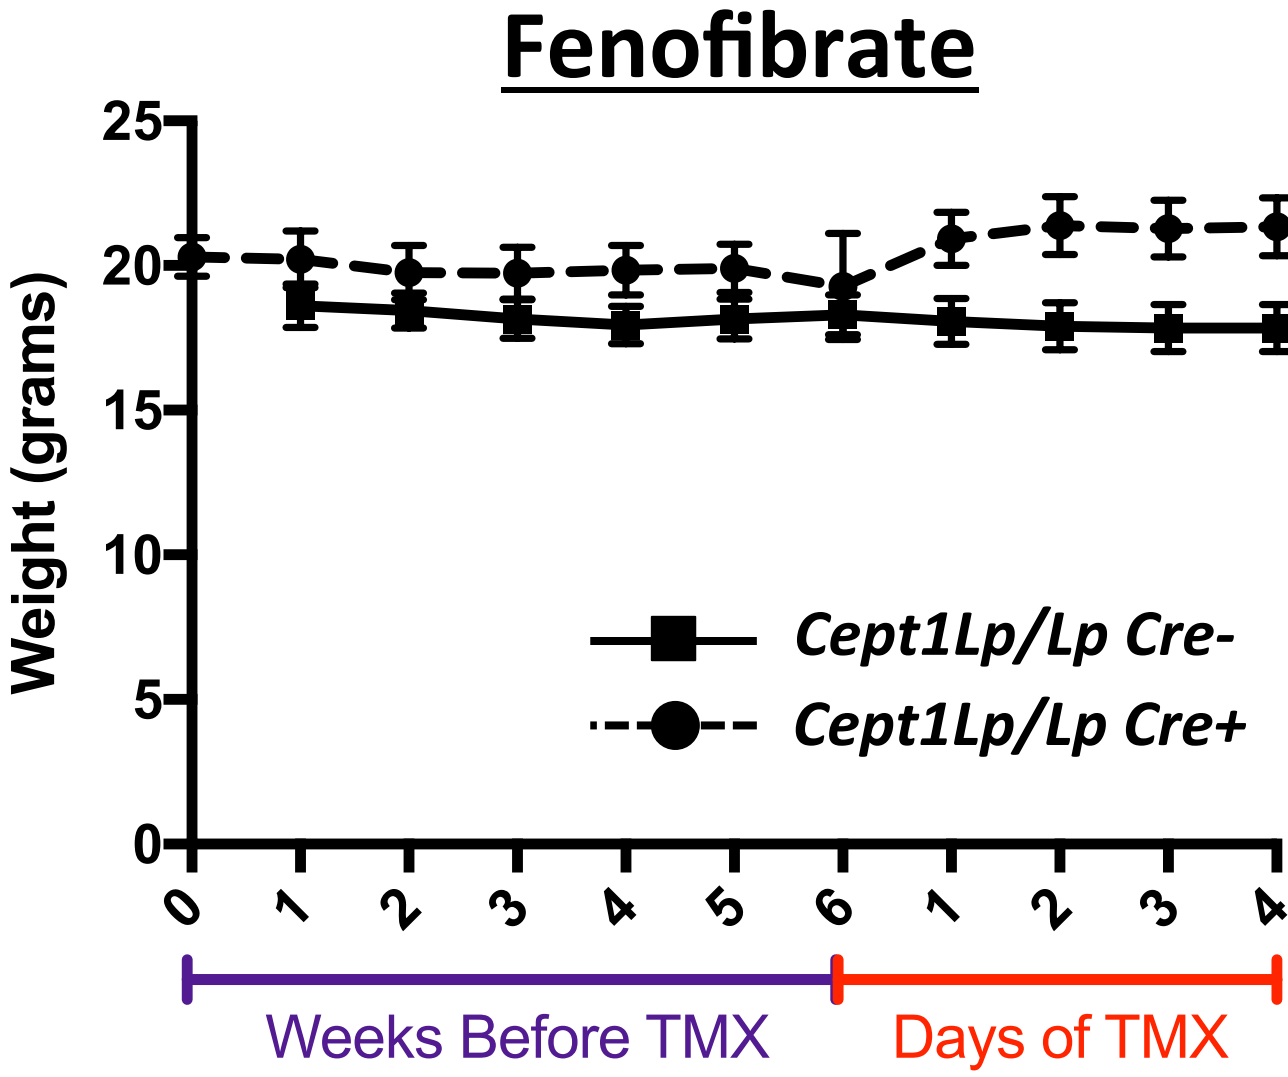

**B**

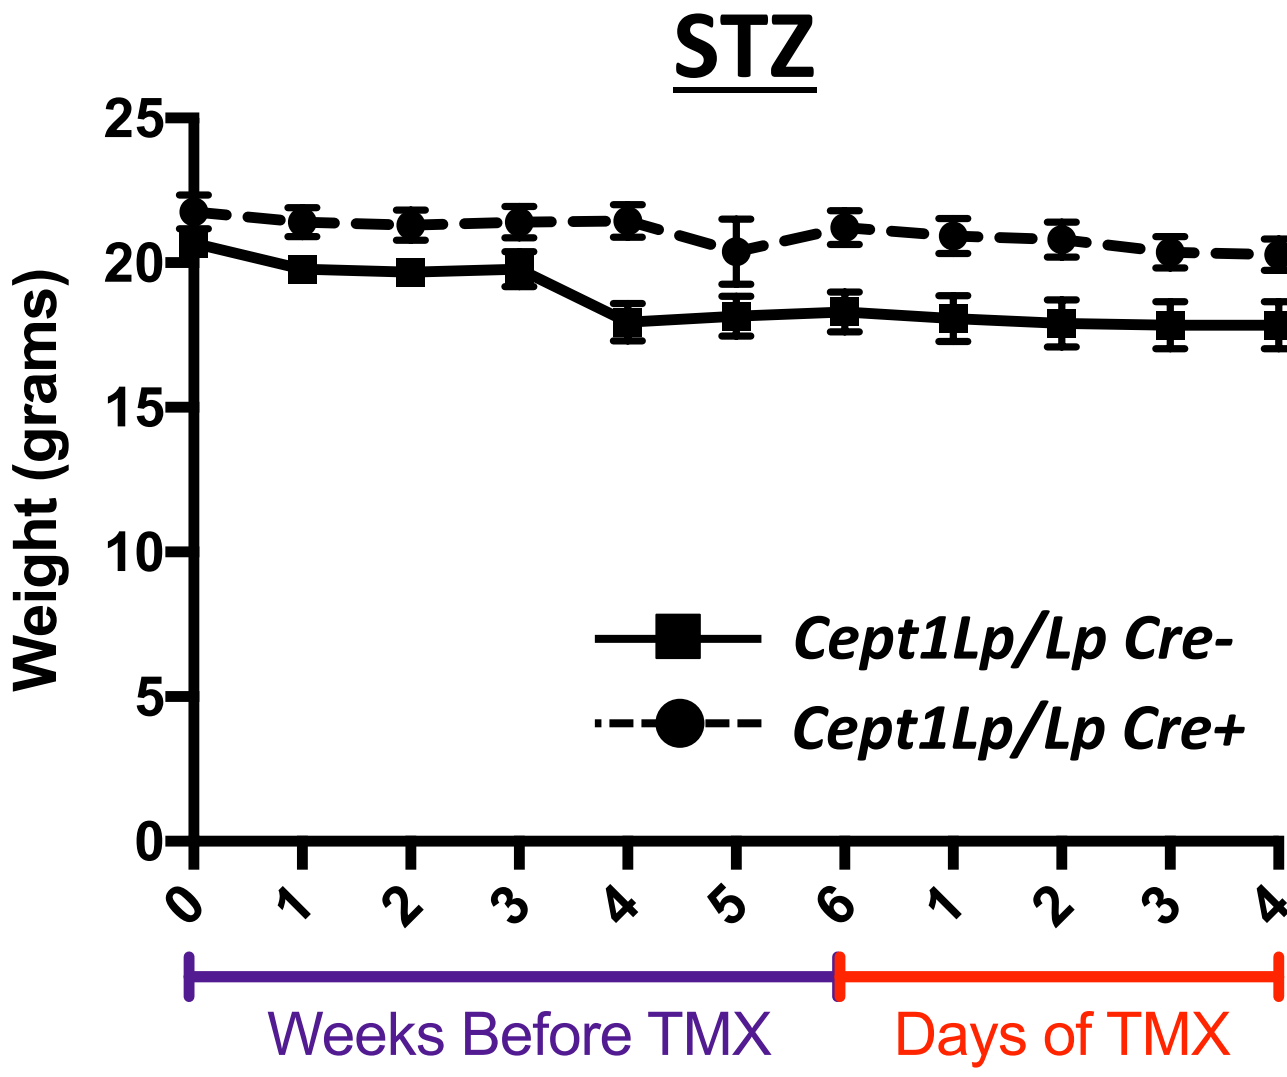

**C**

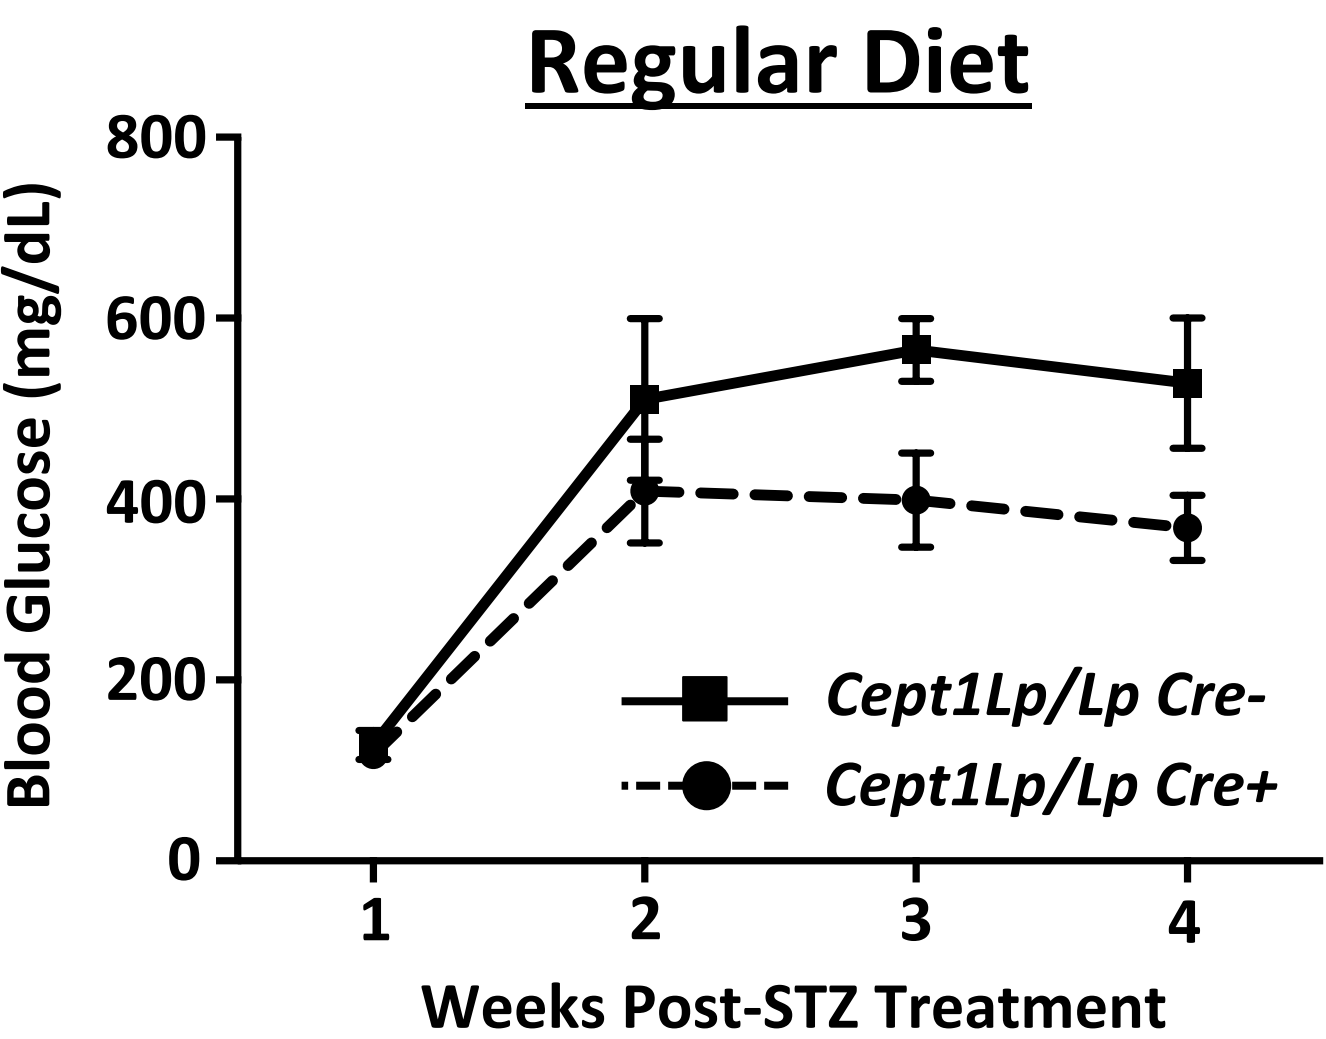

**D**

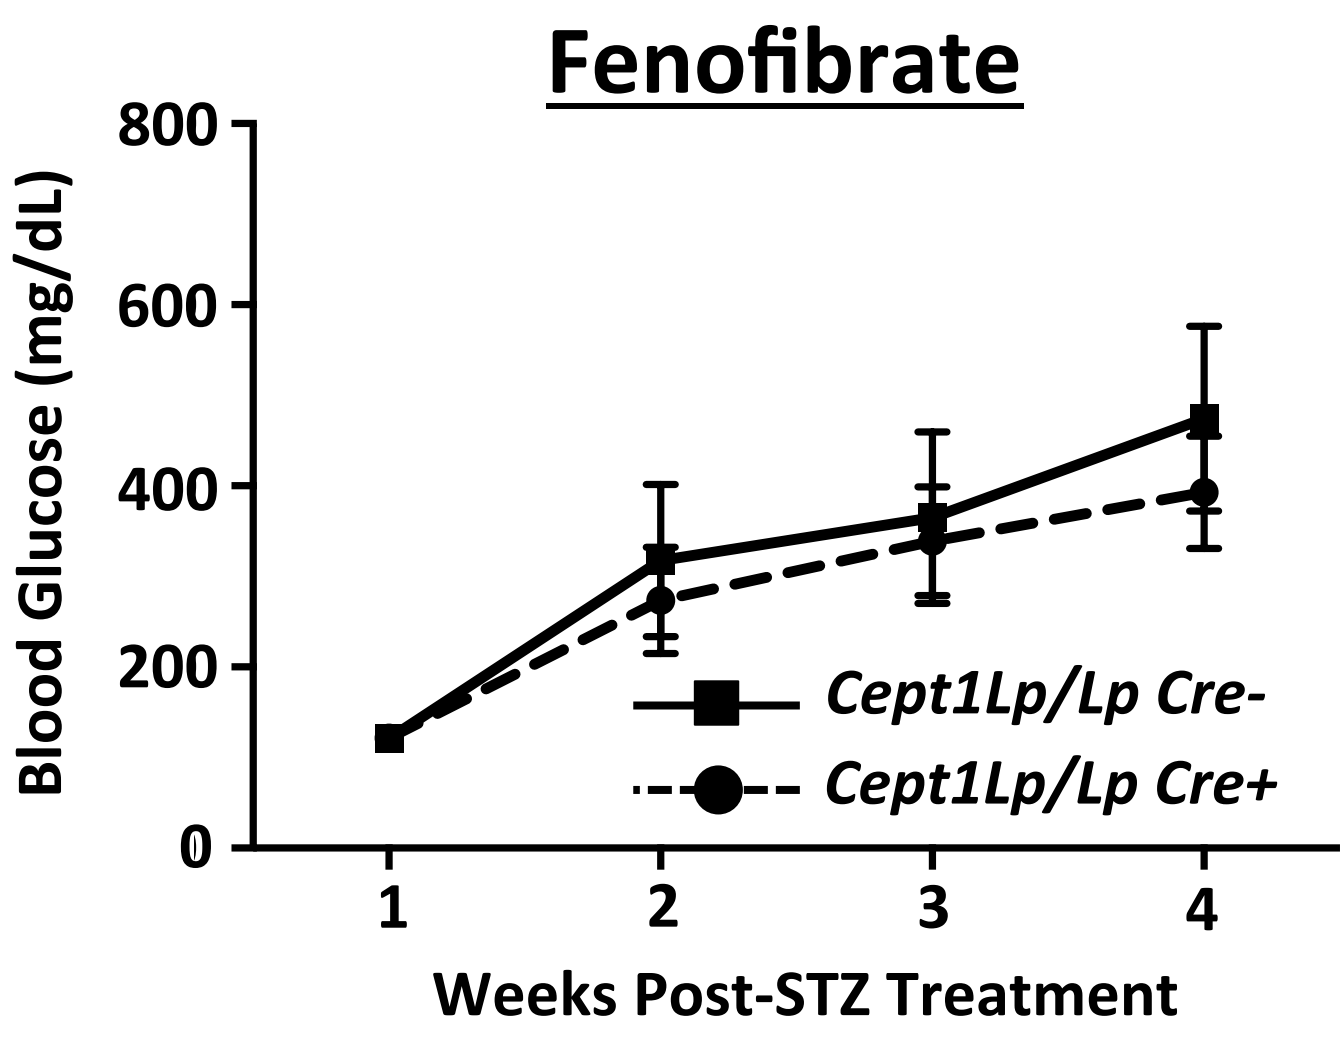



# Supplemental Figure 7

**A**

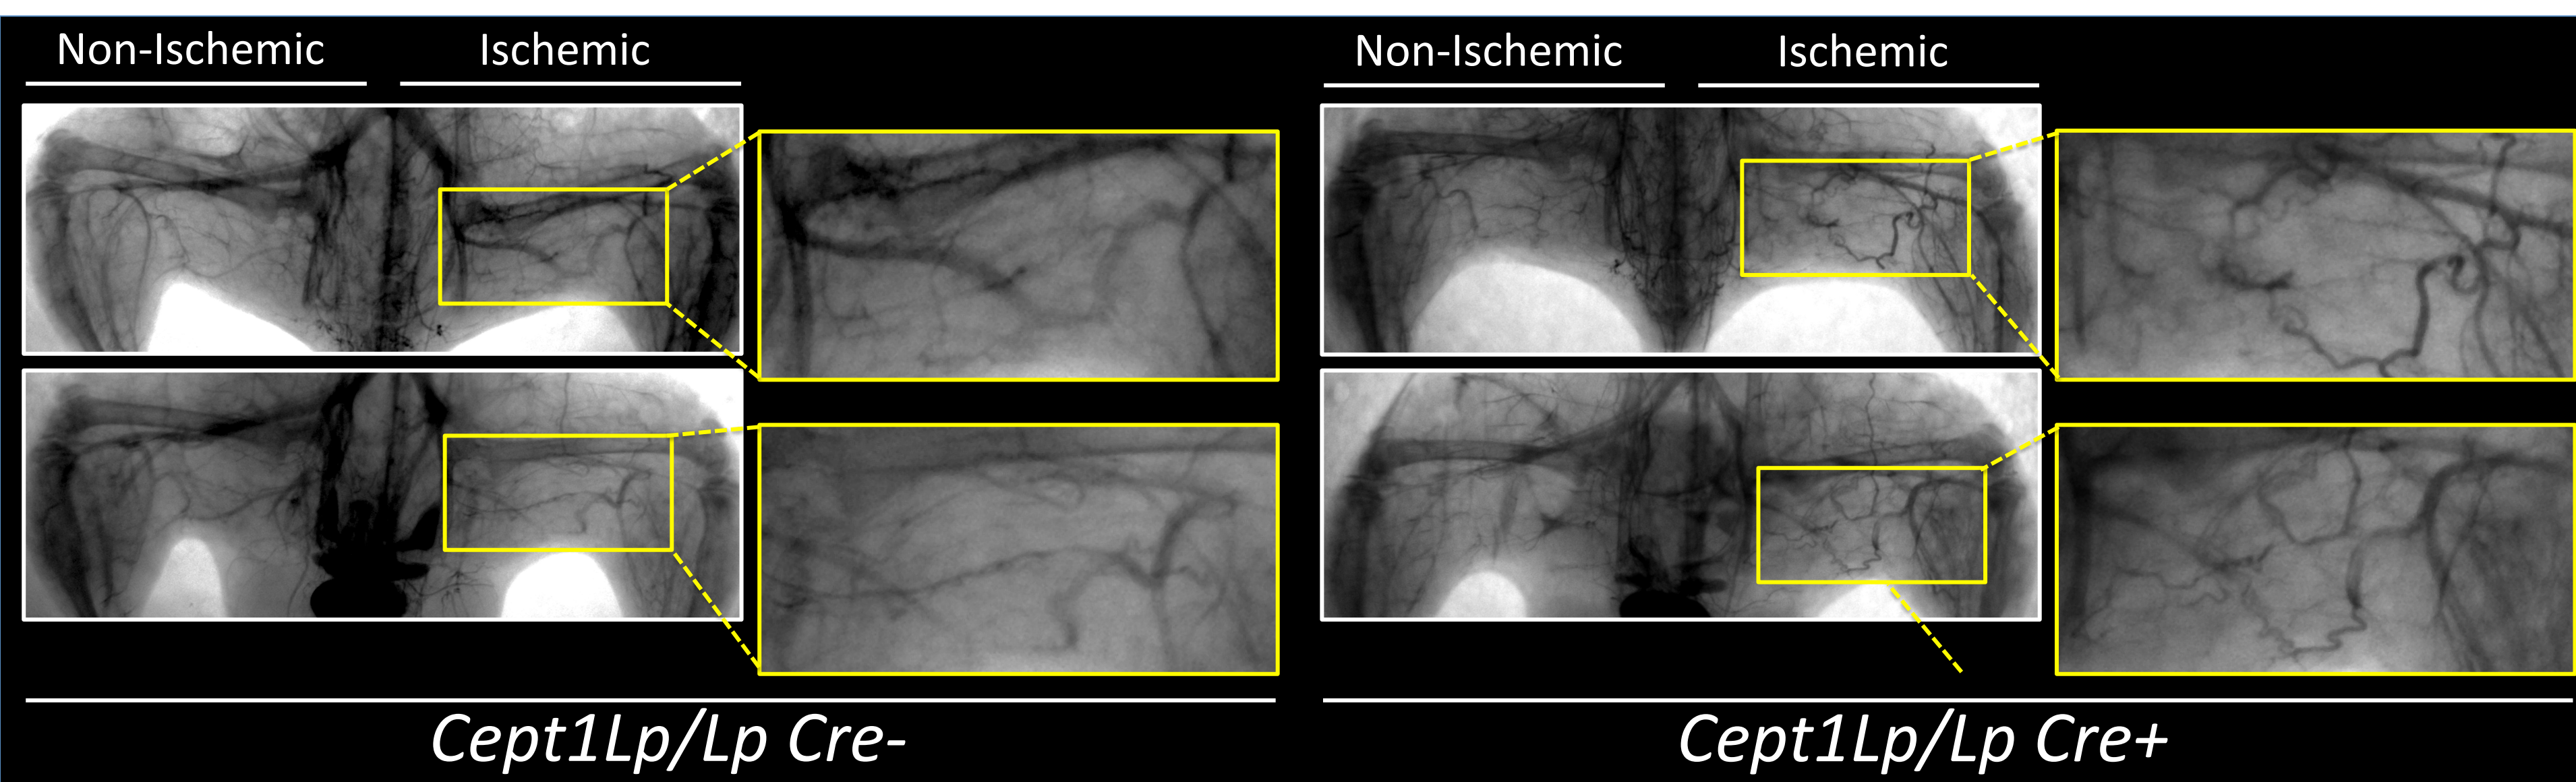

**B**

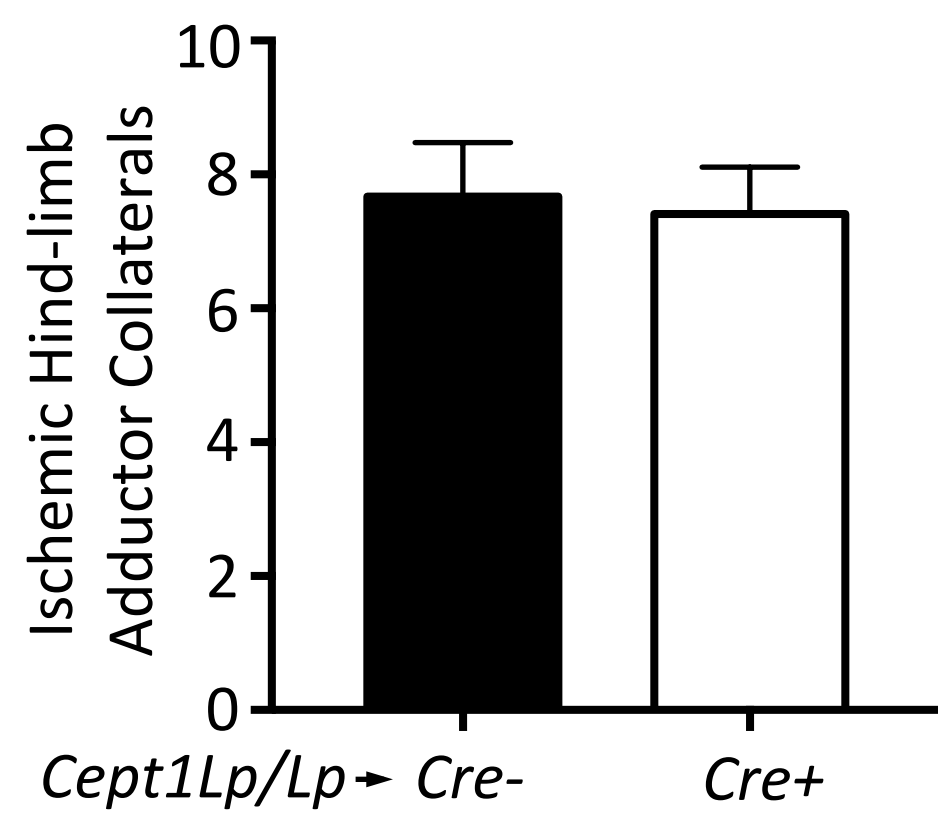

# Supplemental Figure 8

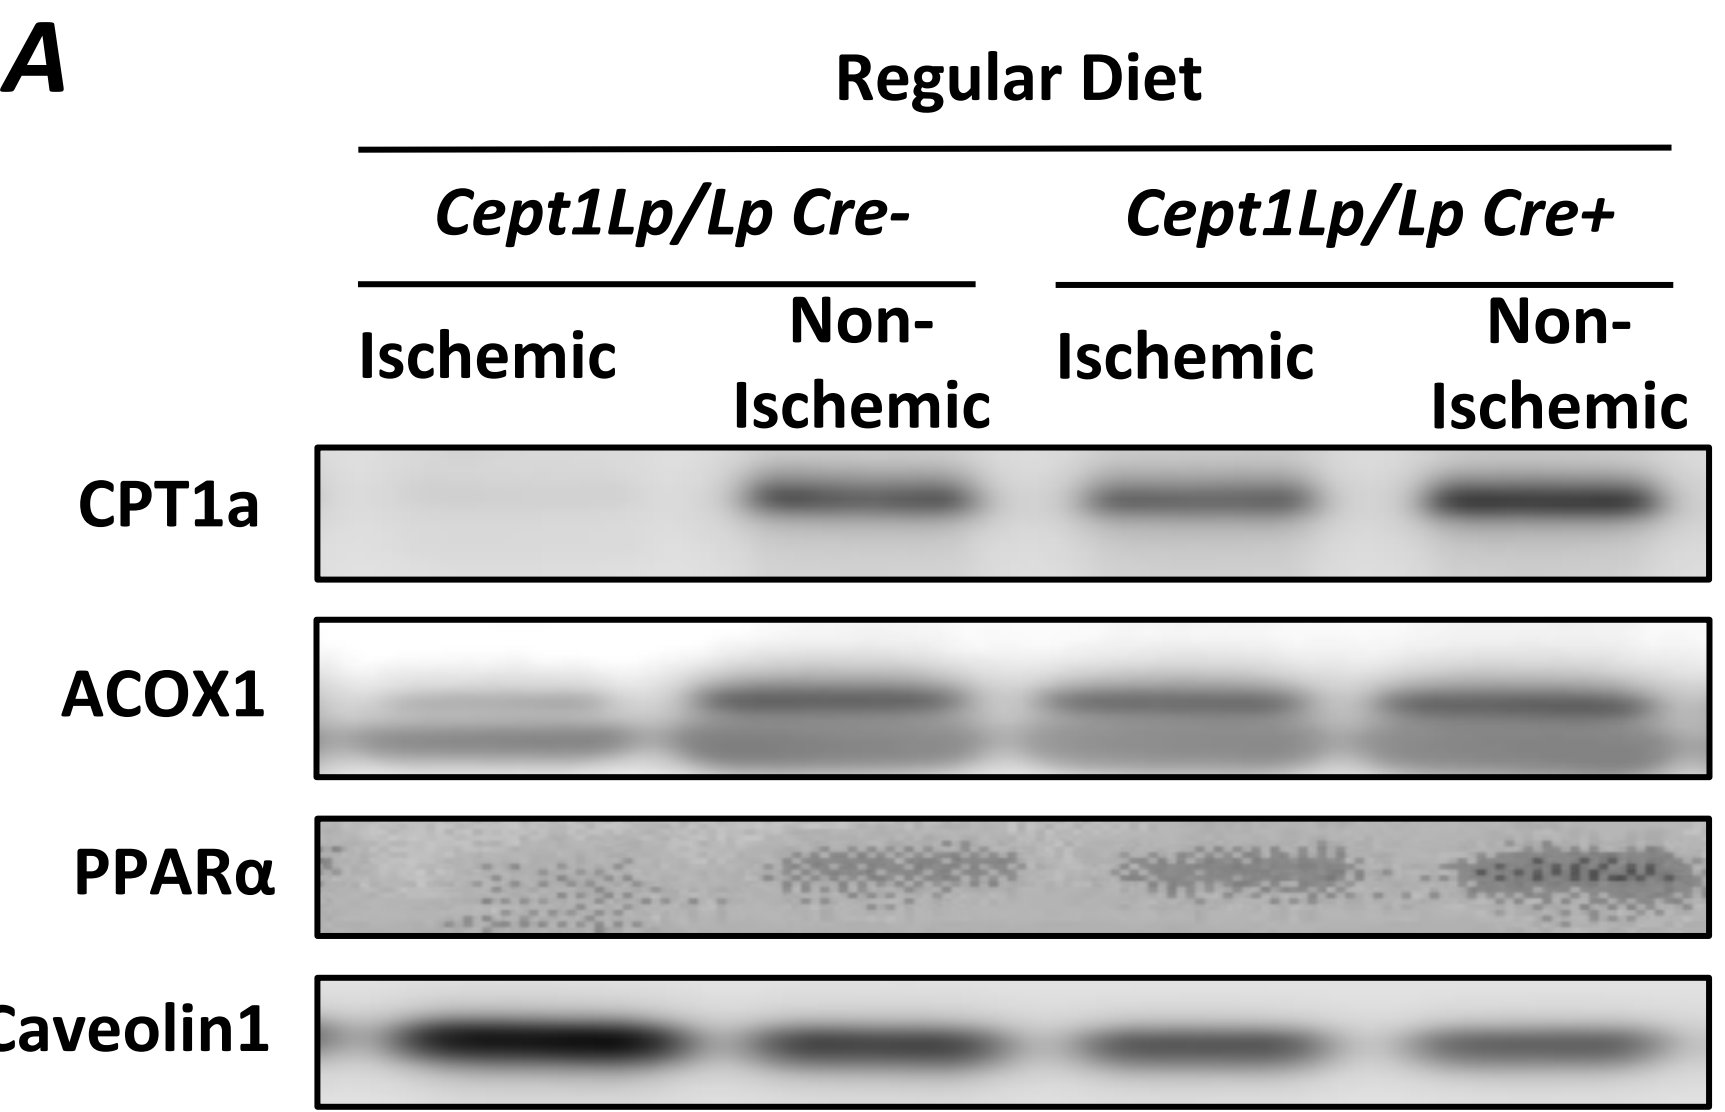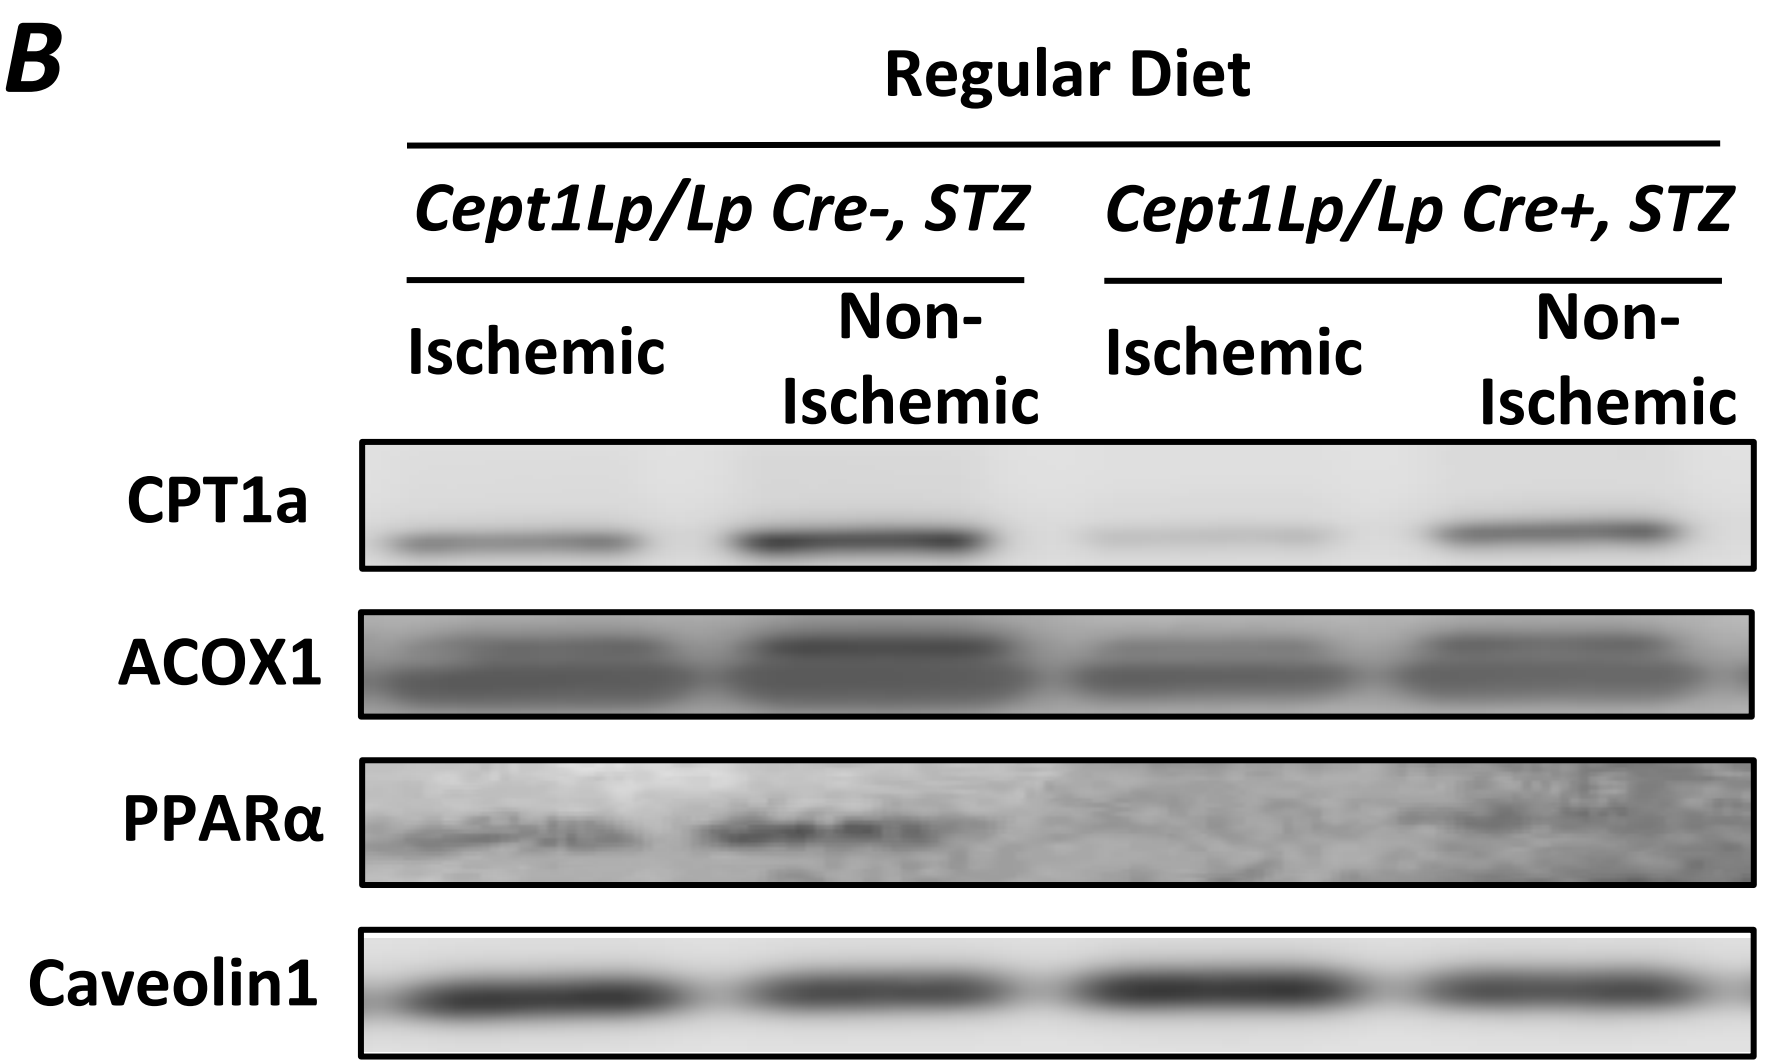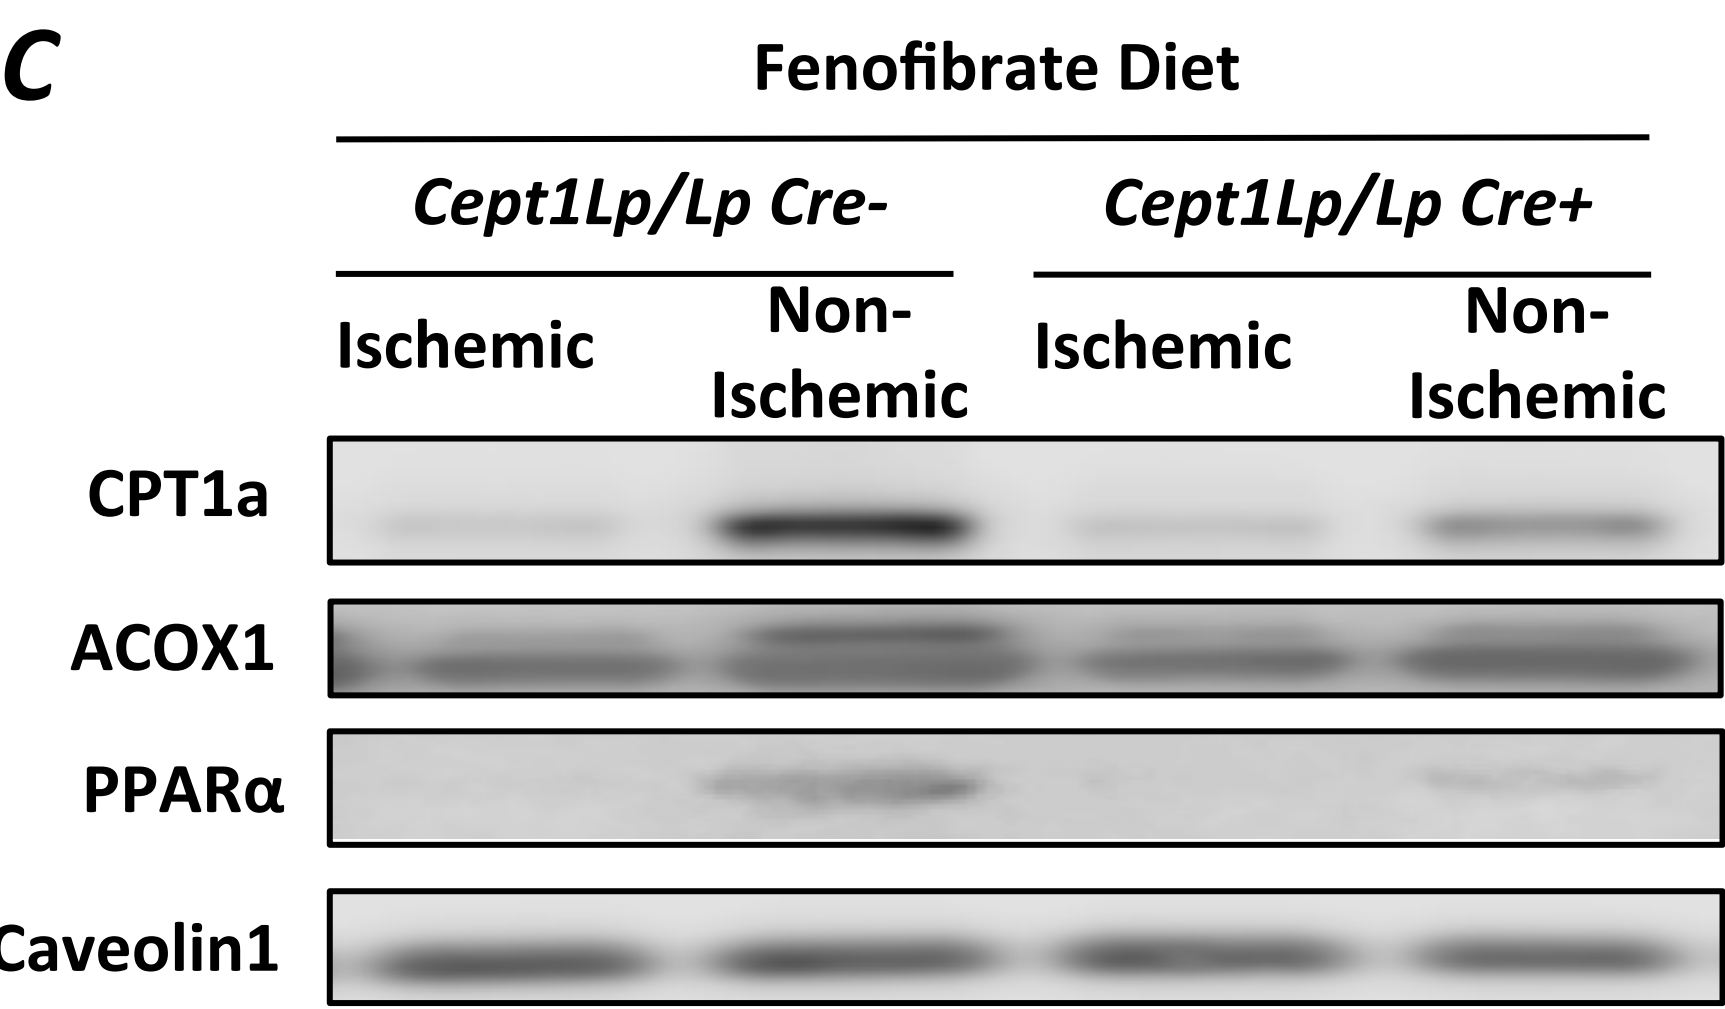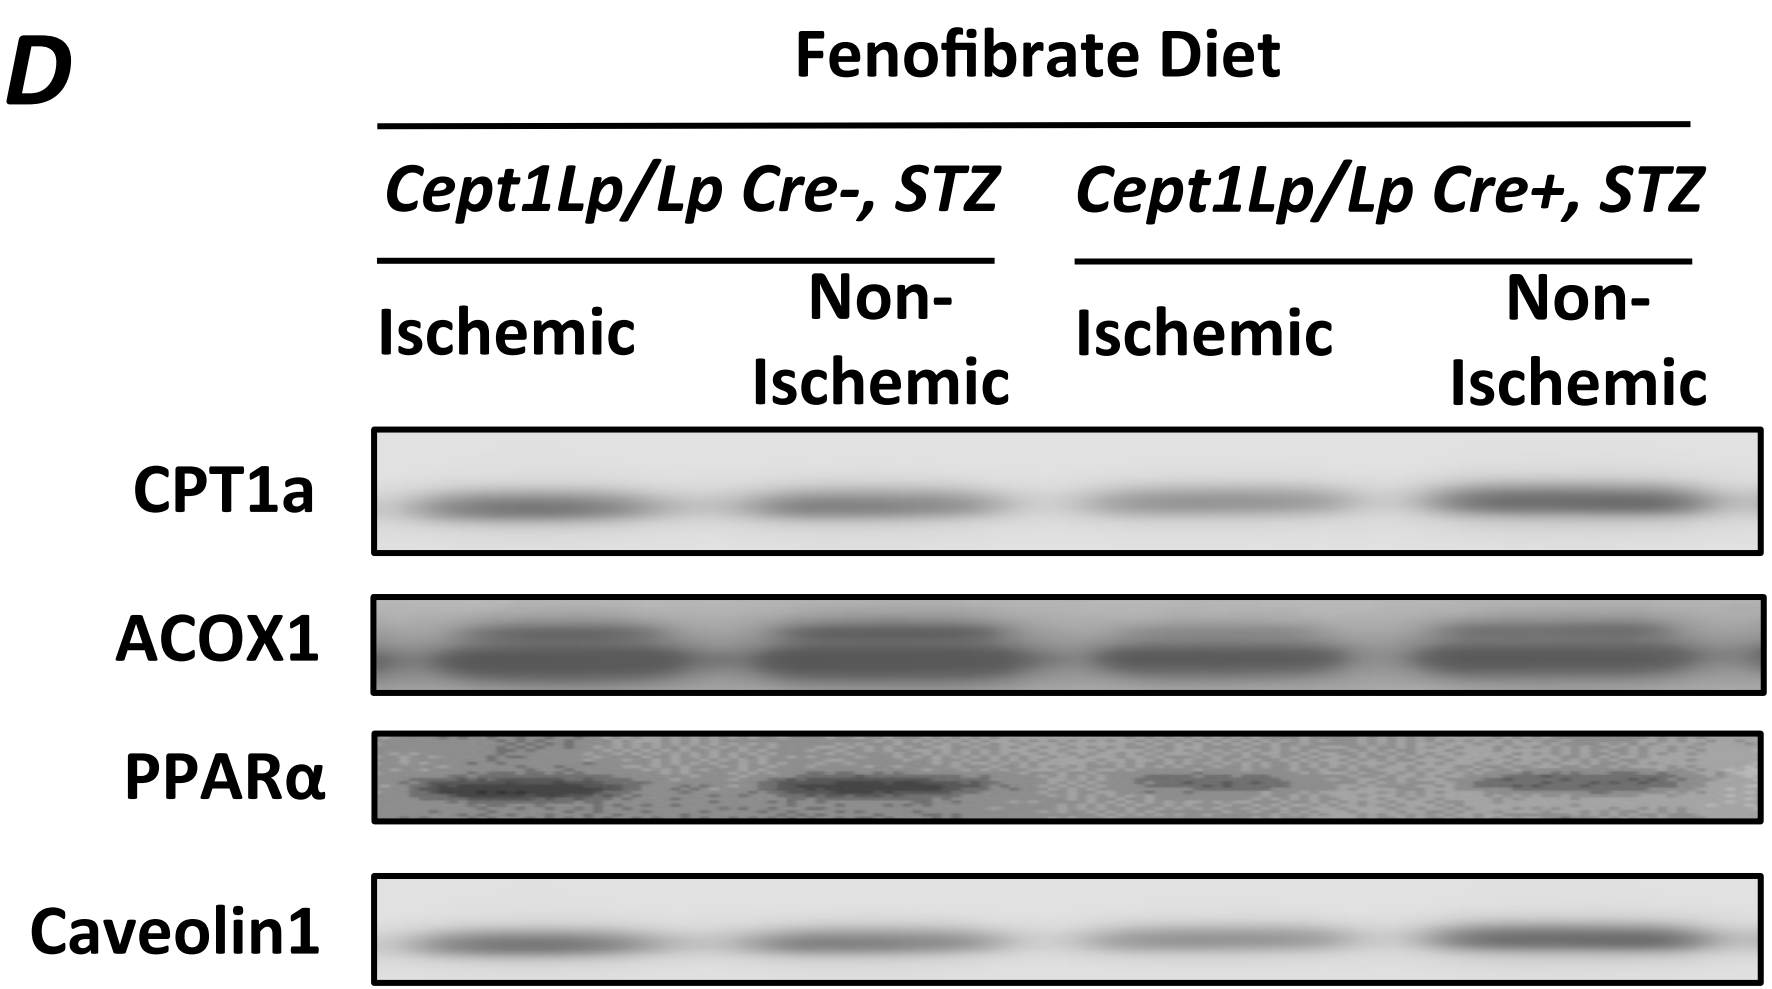

Supplemental Figure 9

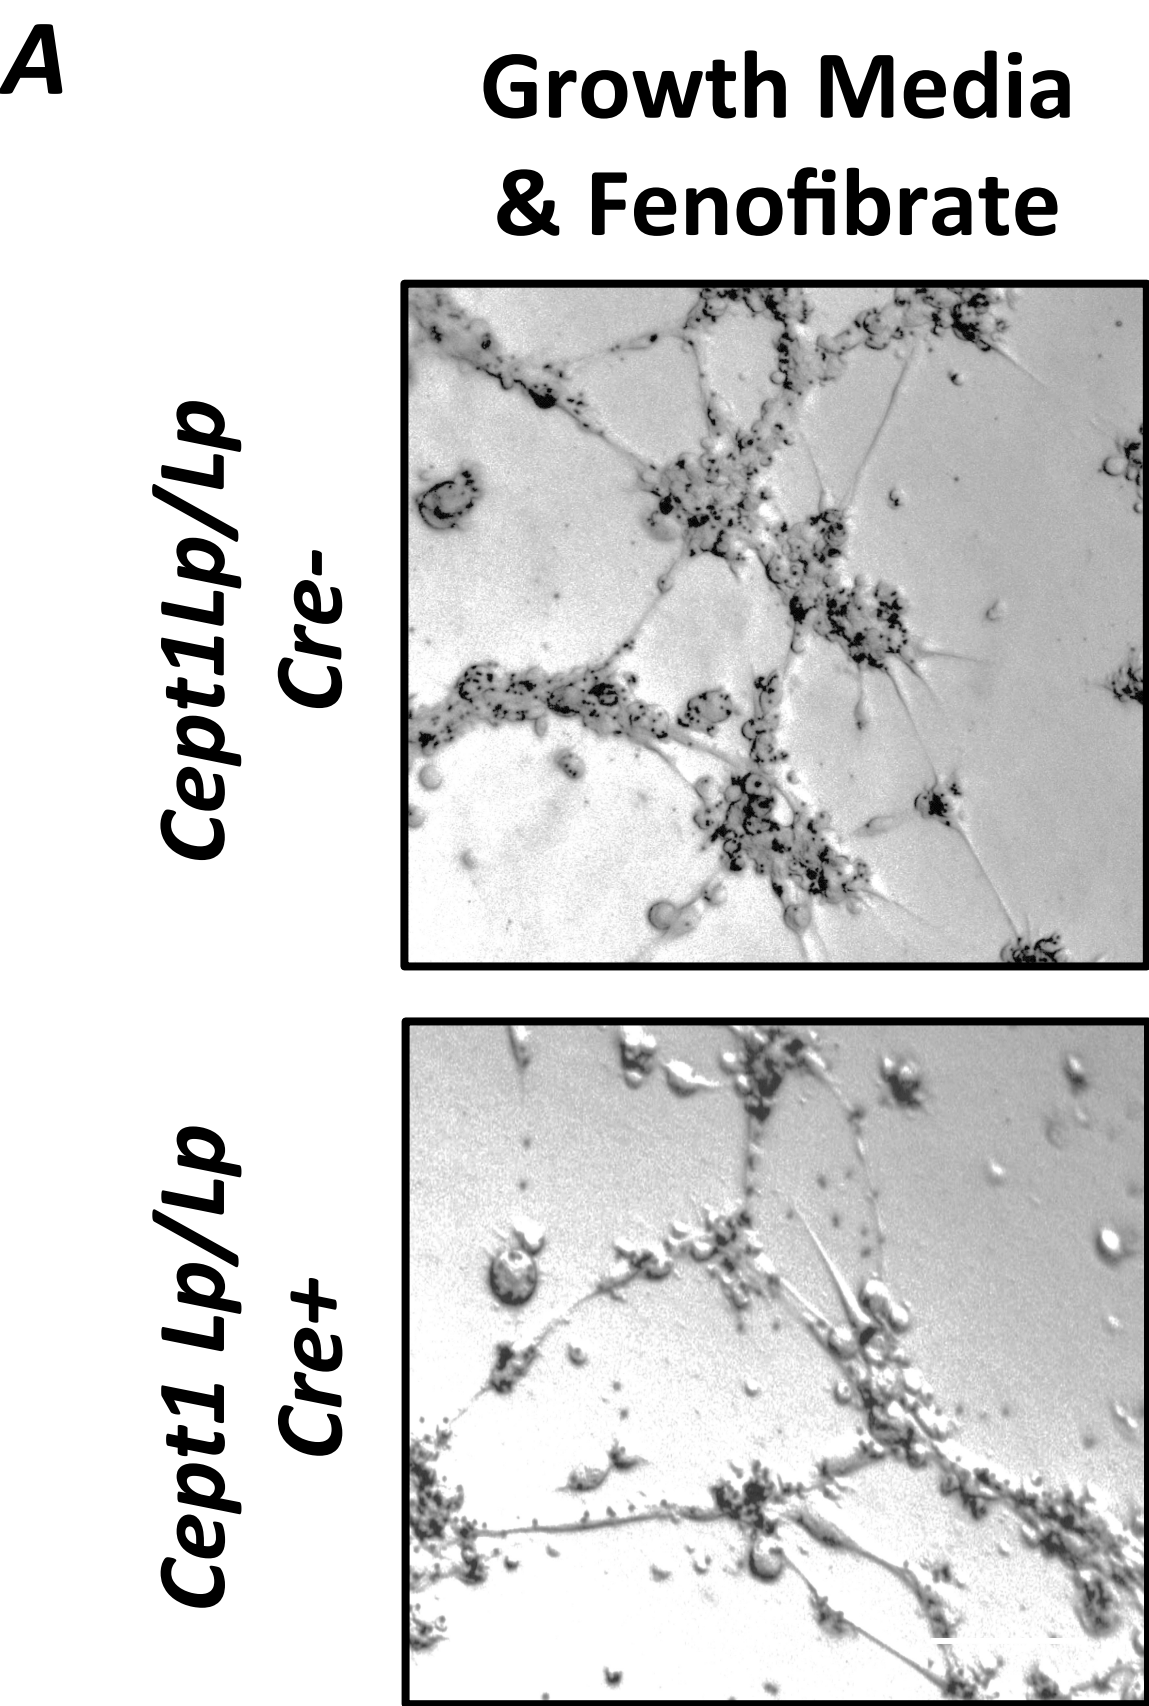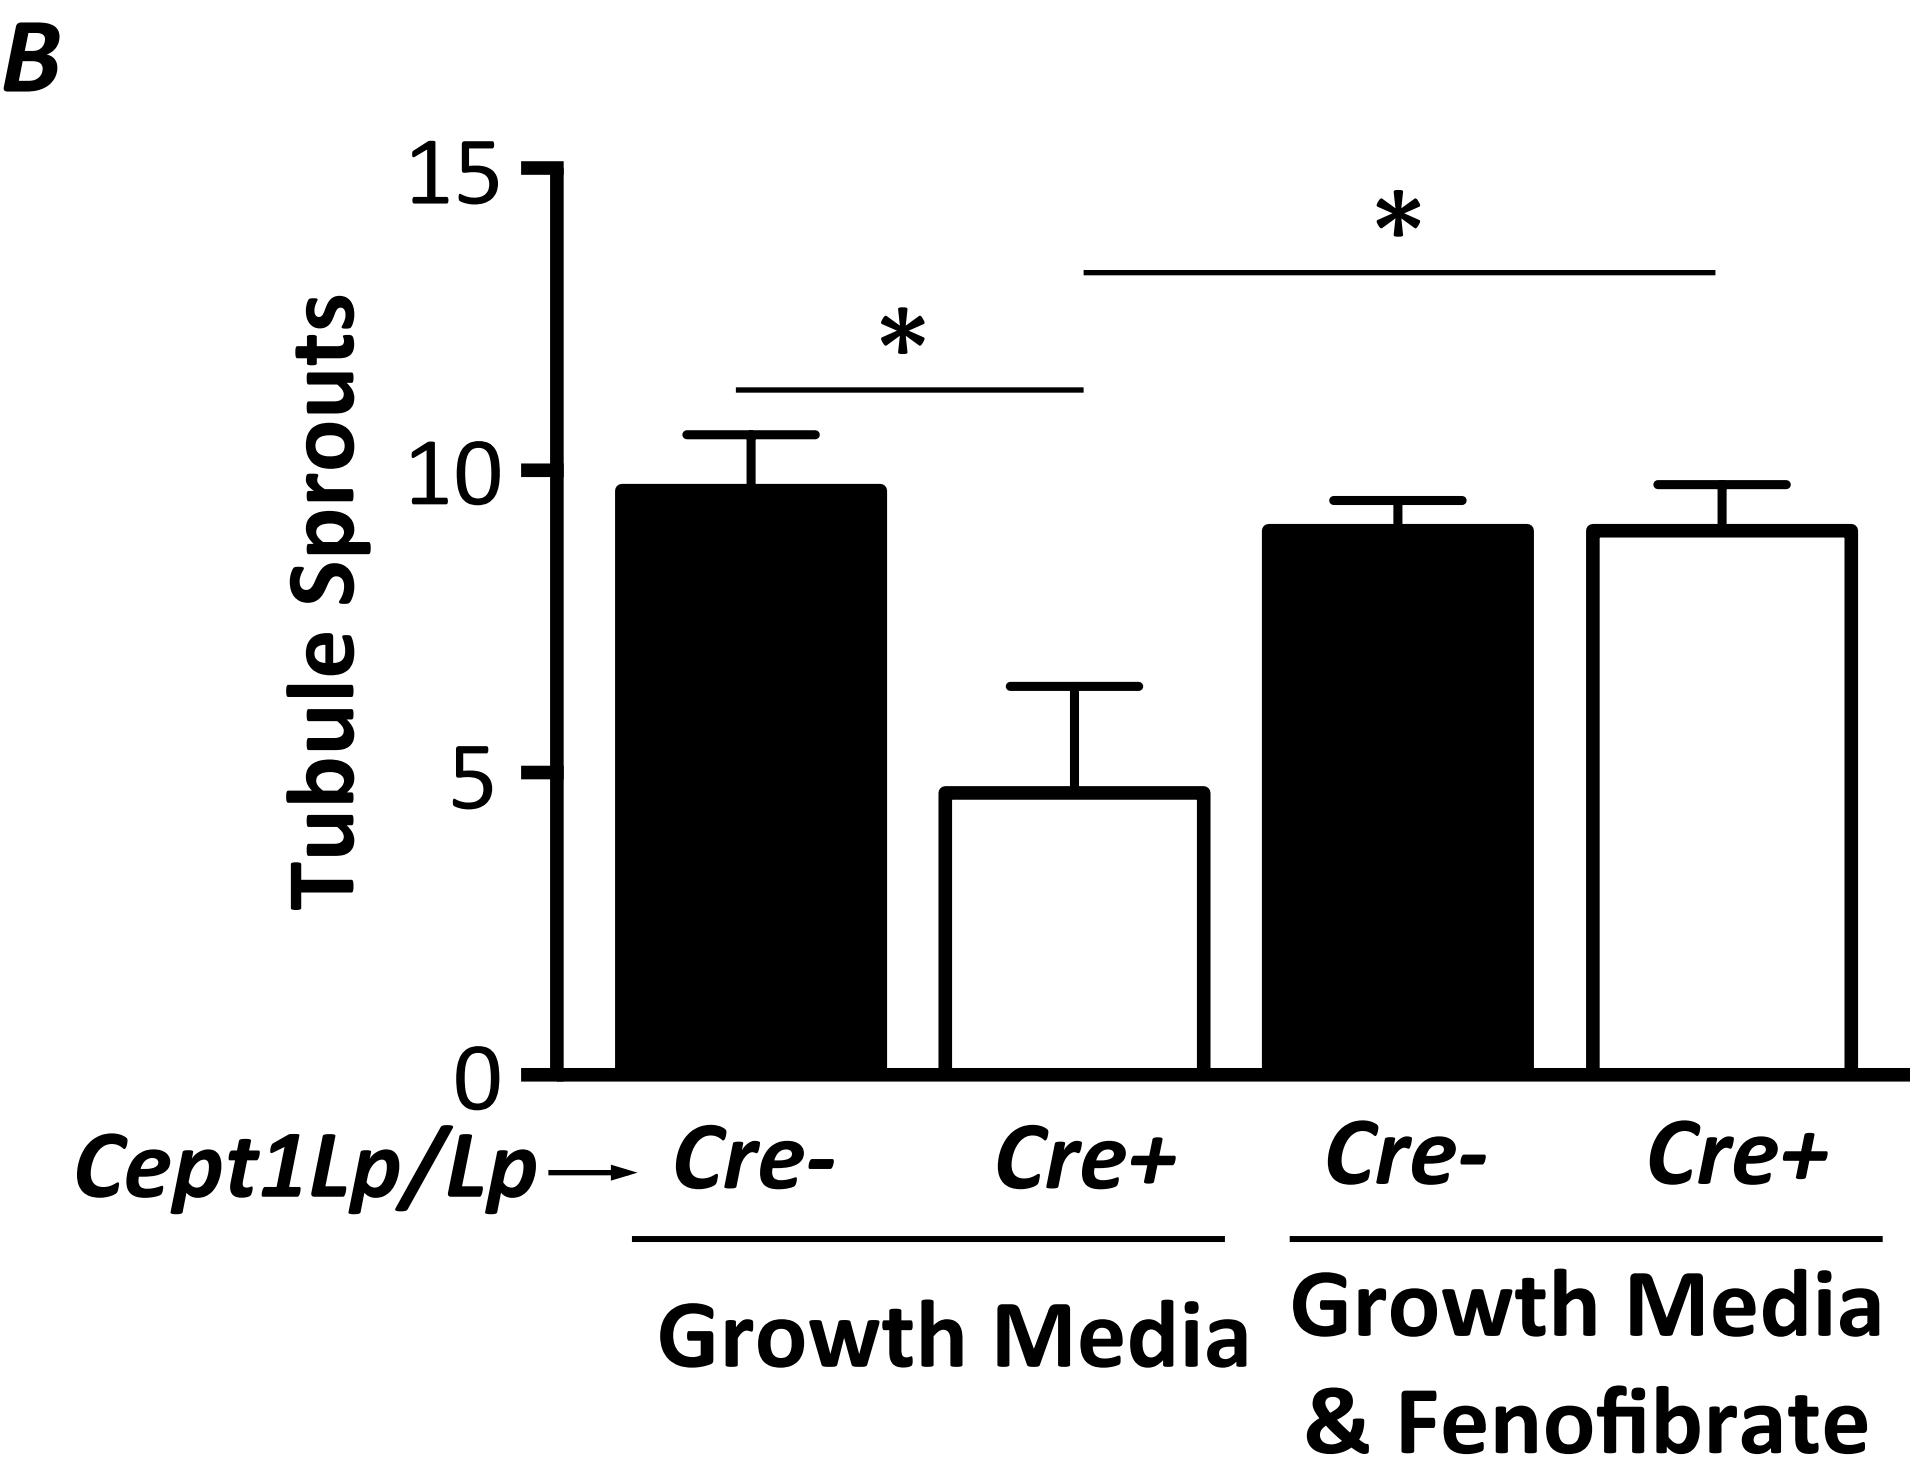

Supplemental Figure 10

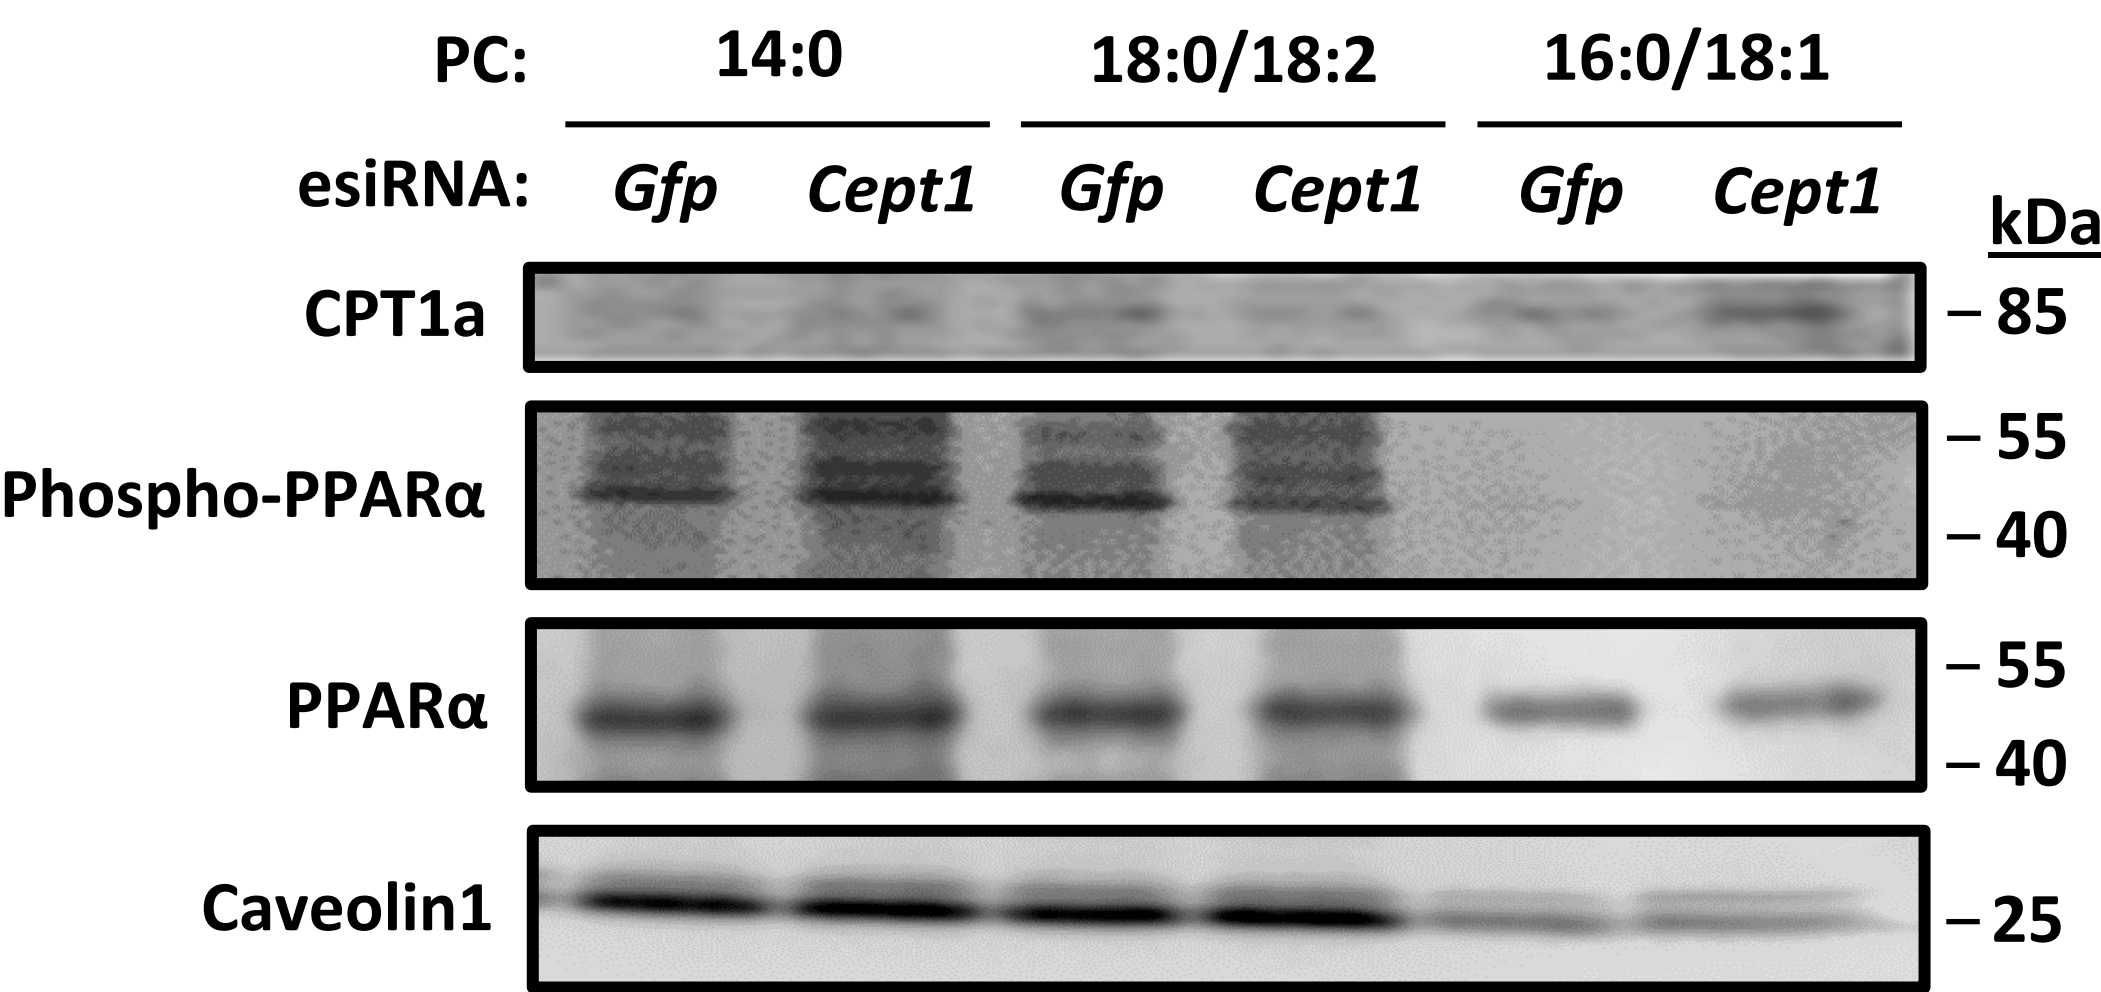

Supplemental Figure 11

*A*

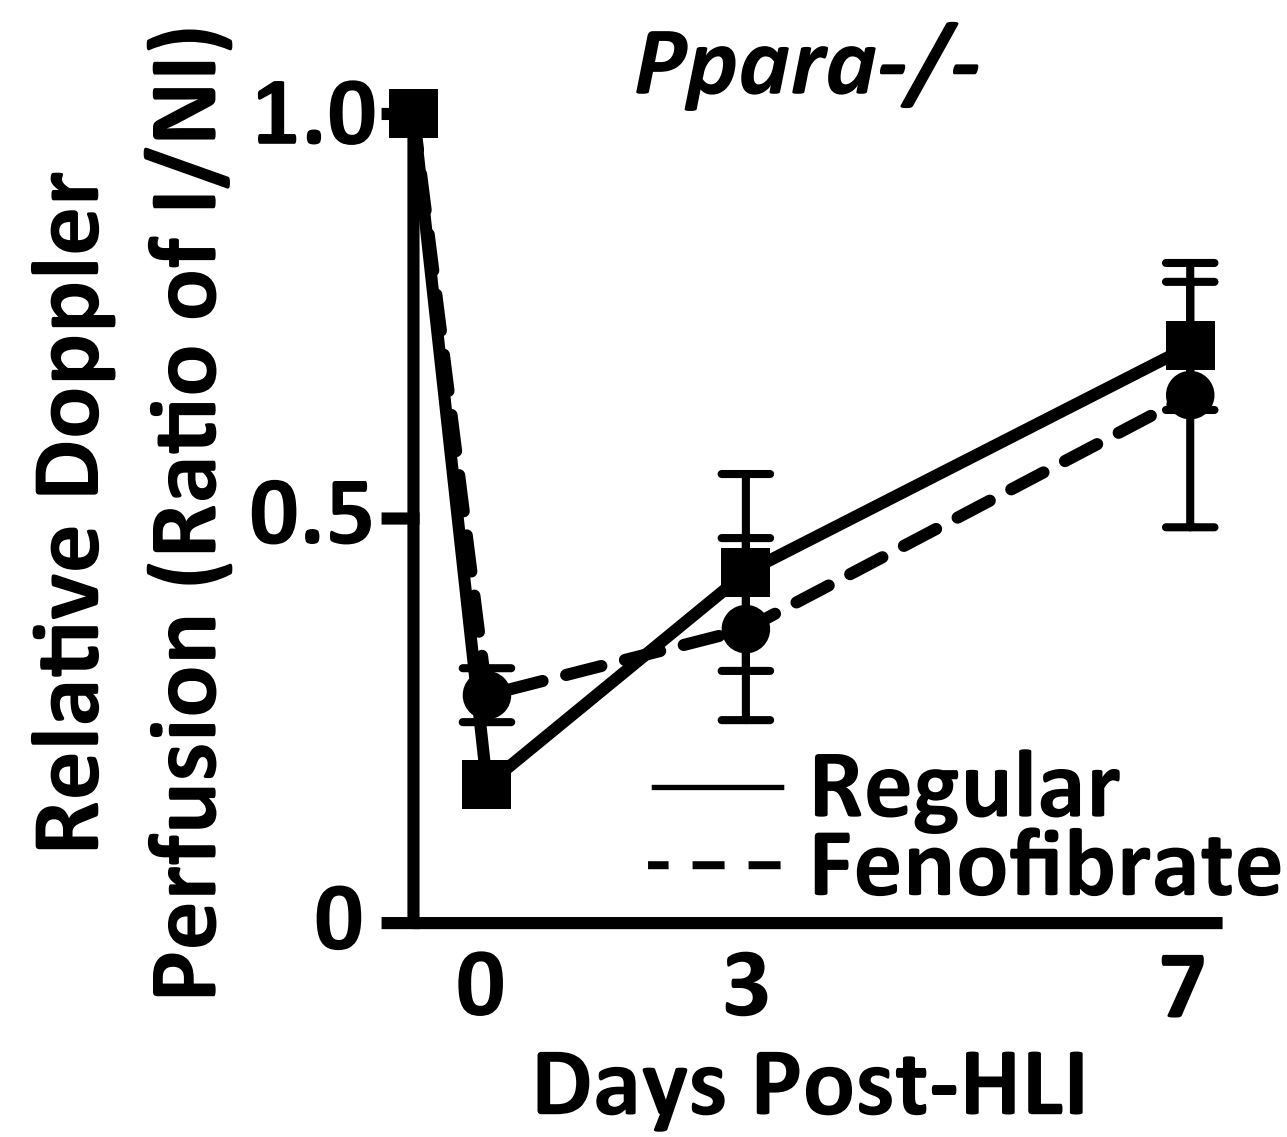

*B*

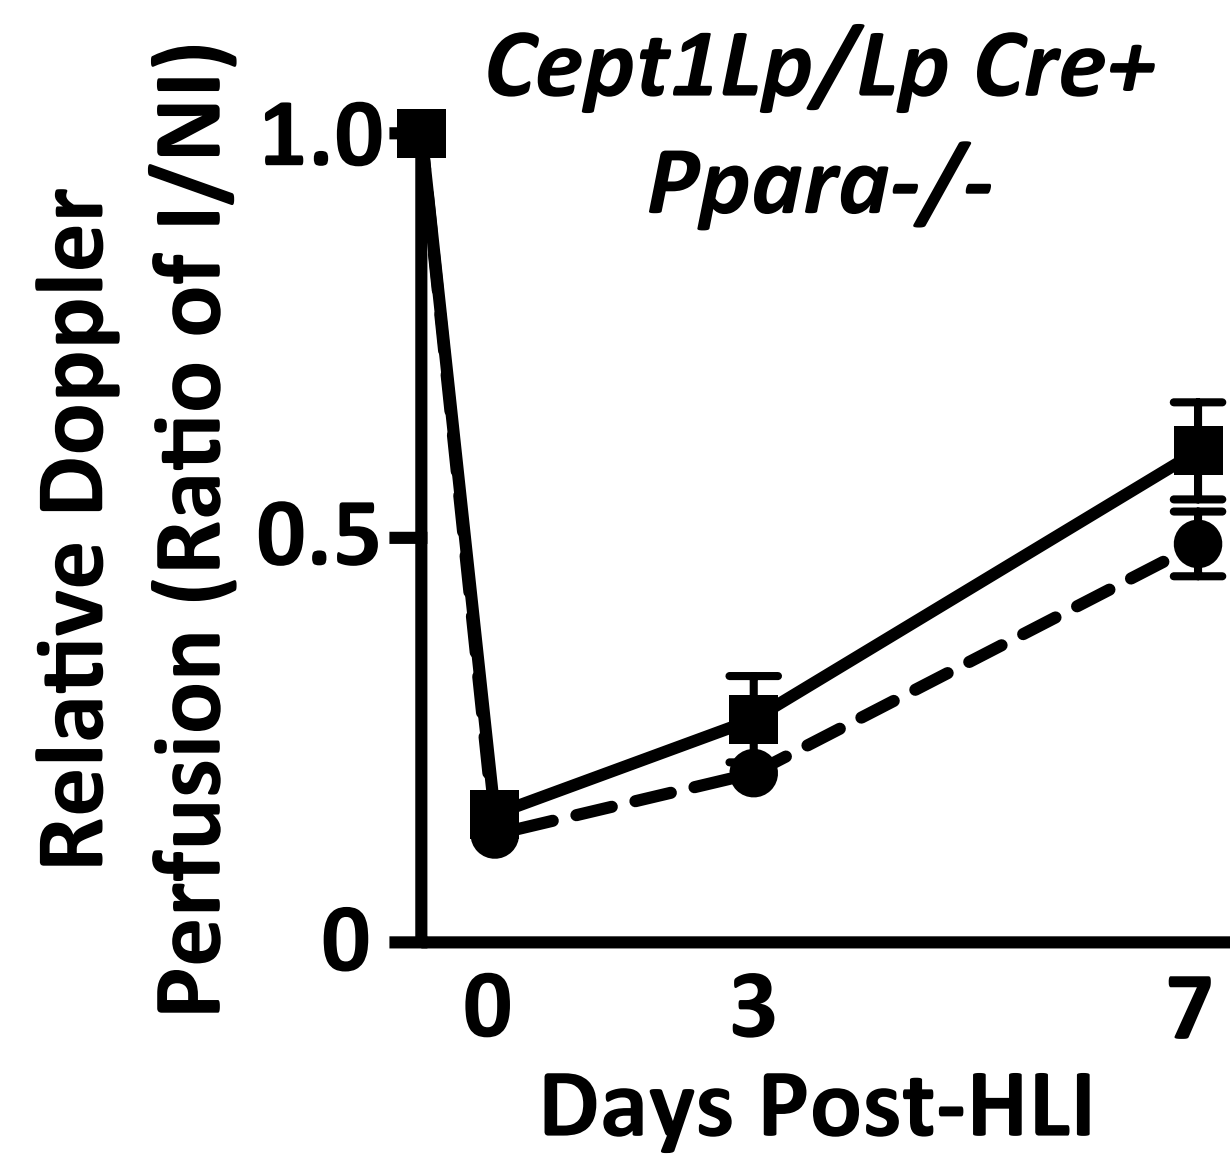

Supplement: Supplementary file 1 [file 1]
