# Supplementary material
Source: publisher figshare collection journal article supplement (https://diabetesjournals.figshare.com/articles/dataset/_/13229129)
Supplement: Supplementary file 2 [file 1]

## SUPPLEMENTAL FIGURE LEGENDS

**Supplemental Figure 1: Conditional knockout of *Cept1* in murine endothelium.** A) *Cept1Lp* allele contains engineered *LoxP* sequences (black triangles) flanking exon 3 (E3) of *Cept1* to facilitate *Cre*-mediated recombination. Primers P1, 2, and 3 are used to confirm successful recombination of E3. B) Representative PRC gel using primers P1 and P2. 1) *Cept1*<sup>+/+</sup> mouse, 2) *Cept1*<sup>+/+</sup>, *VE-cadherin-CreERT2* (*Cre*<sup>+</sup>) mouse, and 3) *Cept1Lp/Lp*, *VE-cadherin-CreERT2* (*Cre*<sup>+</sup>) mouse. C) *Cept1* recombination in organs using PCR primers P1 and P3, demonstrating successful recombination of *Cept1* in heart, aorta, and lung tissue of *Cept1Lp/LpCre*<sup>+</sup> mouse.

**Supplemental Figure 2: *Ppara*, *Acox1*, and *Cpt1a* expression in peripheral arterial tissue.** Maximally (Max) diseased arterial segments have mildly higher levels of *Ppara* (A) and *Cpt1a* (B), and significantly higher levels of *Acox1* (C). \*  $p < 0.05$

**Supplemental Figure 3: CEPT1 protein content in *db/db* and *+/+* mouse aortic and skeletal muscle tissue.** A) Representative Western blot of CEPT1 in aorta and skeletal muscle tissue of *db/db* and *+/+* mice. B) Quantitative assessment of relative CEPT1 content in *db/db* and *+/+* aortic tissue. \*  $p < 0.05$

**Supplemental Figure 4: Summary of absolute quantities of independent phosphatidylcholine (PC) and phosphatidylethanolamine (PE) species evaluated in MLECs isolated from *Cept1Lp/LpCre*<sup>-</sup> and *Cept1Lp/LpCre*<sup>+</sup> mice.** A) 54 independent PC

species were evaluated in *Cept1Lp/LpCre<sup>-</sup>* and *Cept1Lp/LpCre<sup>+</sup>* MLECs. B) 23 independent PE species were evaluated in *Cept1Lp/LpCre<sup>-</sup>* and *Cept1Lp/LpCre<sup>+</sup>* MLECs.

**Supplemental Figure 5: Acute knockdown of *Cept1* decreases endothelial migration.**

Representative images of mouse heart endothelial cell (MHEC) monolayers demonstrate reduced scratch gap closure over 16 hours following transfection with *Cept1* esiRNA.

**Supplemental Figure 6: Bodyweights and blood glucose of *Cept1Lp/LpCre<sup>-</sup>* and *Cept1Lp/LpCre<sup>+</sup>* mice following treatment with Fenofibrate or STZ.**

A) Bodyweights (grams) of *Cept1Lp/LpCre<sup>-</sup>* and *Cept1Lp/LpCre<sup>+</sup>* mice that received a Fenofibrate diet, and pre- and post-TMX treatment for conditional knockout of *Cept1* in the endothelium. B) Bodyweights of mice that received STZ to induce a diabetes-like phenotype, and pre- and post-TMX treatment. C) Blood glucose of *Cept1Lp/LpCre<sup>-</sup>* and *Cept1Lp/LpCre<sup>+</sup>* mice following STZ treatment in maintained on a regular diet. D) Blood glucose of *Cept1Lp/LpCre<sup>-</sup>* and *Cept1Lp/LpCre<sup>+</sup>* mice following STZ treatment in maintained on a Fenofibrate diet.

**Supplemental Figure 7: Collateral vessel density in ischemic hind-limbs of**

***Cept1Lp/LpCre<sup>-</sup>* and *Cept1Lp/LpCre<sup>+</sup>* mice.** A) Representative angiograms of *Cept1Lp/LpCre<sup>-</sup>* and *Cept1Lp/LpCre<sup>+</sup>* mice maintained on a regular diet that underwent unilateral HLI. 14 days post-HLI post-mortem peripheral angiograms were performed to evaluate density of adductor segment hind-limb arterial collaterals (inserts 2.5x magnification). B) Comparative analysis demonstrated no significant difference between

*Cept1Lp/LpCre<sup>-</sup>* (n = 11) and *Cept1Lp/LpCre<sup>+</sup>* (n = 9) ischemic hind-limb adductor arterial collaterals.

**Supplemental Figure 8: PPAR $\alpha$ , CPT1a, and ACOX1 protein content in ischemic and non-ischemic hind-limbs of *Cept1Lp/LpCre<sup>-</sup>* and *Cept1Lp/LpCre<sup>+</sup>* mice.** A) Representative Western blots of CPT1a, ACOX1, and PPAR $\alpha$  in ischemic and non-ischemic hind-limb muscle tissue from *Cept1Lp/LpCre<sup>-</sup>* and *Cept1Lp/LpCre<sup>+</sup>* mice maintained on a regular diet. Caveolin1 blots were used as blot loading controls. B) Representative Western blots from *Cept1Lp/LpCre<sup>-</sup>* and *Cept1Lp/LpCre<sup>+</sup>* mice pre-treated with STZ and maintained on a regular diet. C) Representative Western blots from *Cept1Lp/LpCre<sup>-</sup>* and *Cept1Lp/LpCre<sup>+</sup>* mice maintained on a fenofibrate diet. D) Representative Western blots from *Cept1Lp/LpCre<sup>-</sup>* and *Cept1Lp/LpCre<sup>+</sup>* mice pre-treated with STZ and maintained on a fenofibrate diet.

**Supplemental Figure 9: Effect of Fenofibrate on MLEC tubule formation.** A) Representative images of *Cept1Lp/LpCre<sup>-</sup>* and *Cept1Lp/LpCre<sup>+</sup>* MLEC formation of tubules after 6 hours of incubation on Matrigel with growth media supplemented with 25 $\mu$ M Fenofibrate. B) *Cept1Lp/LpCre<sup>-</sup>* and *Cept1Lp/LpCre<sup>+</sup>* MLEC tubule formation over 6 hours following treatment with or without 25 $\mu$ M Fenofibrate (n = 3 per condition). \*  $p < 0.05$

**Supplemental Figure 10: Impact of 18:0/18:2 and 16:0/18:1 phospholipids on phospho-PPAR $\alpha$  and CPT1a.** Representative Western blots of CPT1a, phospho-PPAR $\alpha$ ,

PPAR $\alpha$ , and Caveolin1 from HUVECs that were pre-treated with esiRNA *Gfp* or *Cept1*, and either PC 14:0, 18:0/18:2, or 16:0/18:1.

**Supplemental Figure 11: Hind-paw Doppler perfusion in *Ppara*<sup>-/-</sup> and *Cept1Lp/LpCre+Ppara*<sup>-/-</sup> mice that received regular or fenofibrate diet.** A) Hind-paw Doppler perfusion recovery at Day 0, 3, and 7 post-HLI in *Ppara*<sup>-/-</sup> mice that received regular (n = 4) and Fenofibrate (n = 12) diets. B) Hind-paw Doppler perfusion recovery post-HLI in *Cept1Lp/LpCre+Ppara*<sup>-/-</sup> mice that received regular (n = 4) and fenofibrate (n = 12).
