# Supplementary material
Source: publisher figshare collection journal article supplement (https://diabetesjournals.figshare.com/articles/dataset/_/13229129)
Supplement: Supplementary file 3 [file 1]

## SUPPLEMENTAL TABLES

Supplemental Table 1

| Gene                     | Primer sequence                |
|--------------------------|--------------------------------|
| <i>Gfp</i> FW            | AGA TCC GCC ACA ACA TCG AG     |
| <i>Gfp</i> REV           | GTC CAT GCC GAG AGT GAT CC     |
| Human- <i>RPL32</i> FW   | AGA AGT TCA TCC GGC ACC AG     |
| Human- <i>RPL32</i> REV  | CTT GAC GTT GTG GAC CAG GA     |
| Human- <i>Cept1</i> FW   | TTG GAT TGC CCT GGT TTT CTC T  |
| Human- <i>Cept1</i> REV  | TCC ACC CCC ATT CTC CTT AAT    |
| Human- <i>Ppara</i> FW   | CCC CTC CTC GGT GAC TTA TC     |
| Human- <i>Ppara</i> REV  | CTG CGG TCG CAC TTG TCA TA     |
| Human- <i>Acox1</i> FW   | GTG TGT GGC ATG GTG TCC TA     |
| Human- <i>Acox1</i> REV  | TCC AAG CTA CCT CCT TGC TT     |
| Human- <i>Cpt1a</i> FW   | AAG TTG GCG TCT GAG AAG CAT    |
| Human- <i>Cpt1a</i> REV  | AGT CAA ACA GCT CCA CTT GCT    |
| Human- <i>Mcad</i> FW    | CAC GGA CCT GGA GAT TGT AGT    |
| Human- <i>Mcad</i> REV   | GAT GCT GAA GAG CTC GGG G      |
| <i>Cre</i> FW            | CCC TGT TTC ACT ATC CAG GT     |
| <i>Cre</i> REV           | GGG TAA CTA AAC TGG TCG AG     |
| Murine- <i>RPL34</i> FW  | GTG GCC CTA TTG AGT GGC AG     |
| Murine- <i>RPL34</i> REV | CAT GCG ACG GAG GAT GAC C      |
| Murine- <i>Cept1</i> FW  | AGT CTT CTA CTG CCC TAC AGC    |
| Murine- <i>Cept1</i> REV | TCC AAG AAC CAC AAA AAC TGT CG |
| Murine- <i>Ppara</i> FW  | TCG AAT ATG TGG GGA CAA GGC    |
| Murine- <i>Ppara</i> REV | GTG TGA CAT CCC GAC AGA CA     |
| Murine- <i>Acox1</i> FW  | TCG AAG AAT GTC GGA TGG CT     |
| Murine- <i>Acox1</i> REV | GCT CGG CAG GTC ATT CAA GT     |
| Murine- <i>Cpt1a</i> FW  | TGG GCC ATC TGT GGG AGT AT     |
| Murine- <i>Cpt1a</i> REV | GCA GGT CCA CAT CAT TTG CC     |
| Murine- <i>Mcad</i> FW   | ATA TGT ATT CCC GGG GTG TCG    |
| Murine- <i>Mcad</i> REV  | GGC GGC CAT TAA GAC CAA AG     |

FW, Forward; REV, Reverse

Supplemental Table 1: RT-PCR primer sequences for human and mouse genes of interest.

**Supplemental Table 2**

| Sample | Species     | Formula               | Most Abundant Mass |
|--------|-------------|-----------------------|--------------------|
| IS     | PC14:0/14:0 | C 36 H 73 O 8 N 1 P 1 | 678.5073798        |
| 1      | PC30:0      | C 38 H 77 O 8 N 1 P 1 | 706.53868          |
| 2      | PC30:1      | C 38 H 75 O 8 N 1 P 1 | 704.5230299        |
| 3      | PC30:2      | C 38 H 73 O 8 N 1 P 1 | 702.5073798        |
| 4      | PC32:0      | C 40 H 81 O 8 N 1 P 1 | 734.5699801        |
| 5      | PC32:1      | C 40 H 79 O 8 N 1 P 1 | 732.55433          |
| 6      | PC32:2      | C 40 H 77 O 8 N 1 P 1 | 730.53868          |
| 7      | PC34:0      | C 42 H 85 O 8 N 1 P 1 | 762.6012802        |
| 8      | PC34:1      | C 42 H 83 O 8 N 1 P 1 | 760.5856302        |
| 9      | PC34:2      | C 42 H 81 O 8 N 1 P 1 | 758.5699801        |
| 10     | PC34:3      | C 42 H 79 O 8 N 1 P 1 | 756.55433          |
| 11     | PC36:1      | C 44 H 87 O 8 N 1 P 1 | 788.6169303        |
| 12     | PC36:2      | C 44 H 85 O 8 N 1 P 1 | 786.6012802        |
| 13     | PC36:3      | C 44 H 83 O 8 N 1 P 1 | 784.5856302        |
| 14     | PC36:4      | C 44 H 81 O 8 N 1 P 1 | 782.5699801        |
| 15     | PC36:5      | C 44 H 79 O 8 N 1 P 1 | 780.55433          |
| 16     | PC38:2      | C 46 H 89 O 8 N 1 P 1 | 814.6325803        |
| 17     | PC38:3      | C 46 H 87 O 8 N 1 P 1 | 812.6169303        |
| 18     | PC38:4      | C 46 H 85 O 8 N 1 P 1 | 810.6012802        |
| 19     | PC38:5      | C 46 H 83 O 8 N 1 P 1 | 808.5856302        |
| 20     | PC38:6      | C 46 H 81 O 8 N 1 P 1 | 806.5699801        |
| 21     | PC40:3      | C 48 H 91 O 8 N 1 P 1 | 840.6482304        |
| 22     | PC40:4      | C 48 H 89 O 8 N 1 P 1 | 838.6325803        |
| 23     | PC40:5      | C 48 H 87 O 8 N 1 P 1 | 836.6169303        |
| 24     | PC40:6      | C 48 H 85 O 8 N 1 P 1 | 834.6012802        |
| 25     | aPC30:0     | C 38 H 79 O 7 N 1 P 1 | 692.5594154        |
| 26     | aPC30:1     | C 38 H 77 O 7 N 1 P 1 | 690.5437653        |
| 27     | aPC32:0     | C 40 H 83 O 7 N 1 P 1 | 720.5907155        |
| 28     | aPC32:1     | C 40 H 81 O 7 N 1 P 1 | 718.5750655        |
| 29     | aPC32:2     | C 40 H 79 O 7 N 1 P 1 | 716.5594154        |
| 30     | aPC34:0     | C 42 H 87 O 7 N 1 P 1 | 748.6220157        |
| 31     | aPC34:1     | C 42 H 85 O 7 N 1 P 1 | 746.6063656        |
| 32     | aPC34:2     | C 42 H 83 O 7 N 1 P 1 | 744.5907155        |
| 33     | aPC36:1     | C 44 H 89 O 7 N 1 P 1 | 774.6376657        |
| 34     | aPC36:2     | C 44 H 87 O 7 N 1 P 1 | 772.6220157        |
| 35     | aPC36:3     | C 44 H 85 O 7 N 1 P 1 | 770.6063656        |
| 36     | aPC36:4     | C 44 H 83 O 7 N 1 P 1 | 768.5907155        |
| 37     | aPC38:2     | C 46 H 91 O 7 N 1 P 1 | 800.6533158        |
| 38     | aPC38:3     | C 46 H 89 O 7 N 1 P 1 | 798.6376657        |
| 39     | aPC38:4     | C 46 H 87 O 7 N 1 P 1 | 796.6220157        |
| 40     | aPC38:5     | C 46 H 85 O 7 N 1 P 1 | 794.6063656        |
| 41     | SPM34:1     | C 39 H 80 N 2 O 6 P 1 | 703.5753998        |
| 42     | SPM34:2     | C 39 H 78 N 2 O 6 P 1 | 701.5597498        |

|    |         |                       |             |
|----|---------|-----------------------|-------------|
| 43 | SPM36:1 | C 41 H 84 N 2 O 6 P 1 | 731.6066999 |
| 44 | SPM36:2 | C 41 H 82 N 2 O 6 P 1 | 729.5910499 |
| 45 | SPM38:1 | C 43 H 88 N 2 O 6 P 1 | 759.6380001 |
| 46 | SPM39:1 | C 44 H 90 N 2 O 6 P 1 | 773.6536501 |
| 47 | SPM40:1 | C 45 H 92 N 2 O 6 P 1 | 787.6693002 |
| 48 | SPM41:1 | C 46 H 94 N 2 O 6 P 1 | 801.6849503 |
| 49 | SPM42:1 | C 47 H 96 N 2 O 6 P 1 | 815.7006003 |
| 50 | SPM42:2 | C 47 H 94 N 2 O 6 P 1 | 813.6849503 |
| 51 | SPM42:3 | C 47 H 92 N 2 O 6 P 1 | 811.6693002 |
| 52 | pPC34:2 | C 42 H 81 O 7 N 1 P 1 | 742.5750655 |
| 53 | pPC36:4 | C 44 H 81 O 7 N 1 P 1 | 766.5750655 |
| 54 | pPC38:5 | C 46 H 83 O 7 N 1 P 1 | 792.5907155 |

IS, Internal Standard

Supplemental Table 2: Summary of phosphatidylcholine (PC), alkyl ether PC (aPC), sphingomyelin (SPM), and plasmalogen PC (pPC) species evaluated in arterial intima tissue and ECs using electrospray ionization mass spectrometry.

### Supplemental Table 3

| Sample | Species     | Formula               | Most abundant mass |
|--------|-------------|-----------------------|--------------------|
| IS     | PE14:0/14:0 | C 33 H 65 N 1 O 8 P 1 | 634.4447796        |
| 1      | PE34:1      | C 39 H 75 N 1 O 8 P 1 | 716.5230299        |
| 2      | PE34:2      | C 39 H 73 N 1 O 8 P 1 | 714.5073798        |
| 3      | PE36:2      | C 41 H 77 N 1 O 8 P 1 | 742.53868          |
| 4      | PE36:3      | C 41 H 75 N 1 O 8 P 1 | 740.5230299        |
| 5      | PE36:4      | C 41 H 73 N 1 O 8 P 1 | 738.5073798        |
| 6      | PE38:4      | C 43 H 77 N 1 O 8 P 1 | 766.53868          |
| 7      | PE38:5      | C 43 H 75 N 1 O 8 P 1 | 764.5230299        |
| 8      | PE38:6      | C 43 H 73 N 1 O 8 P 1 | 762.5073798        |
| 9      | PE40:5      | C 45 H 79 N 1 O 8 P 1 | 792.55433          |
| 10     | PE40:6      | C 45 H 77 N 1 O 8 P 1 | 790.53868          |
| 11     | PE40:7      | C 45 H 75 N 1 O 8 P 1 | 788.5230299        |
| 12     | PE40:8      | C 45 H 73 N 1 O 8 P 1 | 786.5073798        |
| 13     | pPE34:1     | C 39 H 75 N 1 O 7 P 1 | 700.5281153        |
| 14     | pPE34:2     | C 39 H 73 N 1 O 7 P 1 | 698.5124652        |
| 15     | pPE36:2     | C 41 H 77 N 1 O 7 P 1 | 726.5437653        |
| 16     | pPE36:3     | C 41 H 75 N 1 O 7 P 1 | 724.5281153        |
| 17     | pPE36:4     | C 41 H 73 N 1 O 7 P 1 | 722.5124652        |
| 18     | pPE38:4     | C 43 H 77 N 1 O 7 P 1 | 750.5437653        |
| 19     | pPE38:5     | C 43 H 75 N 1 O 7 P 1 | 748.5281153        |
| 20     | pPE38:6     | C 43 H 73 N 1 O 7 P 1 | 746.5124652        |
| 21     | pPE40:5     | C 45 H 79 N 1 O 7 P 1 | 776.5594154        |
| 22     | pPE40:6     | C 45 H 77 N 1 O 7 P 1 | 774.5437653        |
| 23     | pPE40:7     | C 45 H 75 N 1 O 7 P 1 | 772.5281153        |

IS, Internal Standard

Supplemental Table 3: Summary of phosphatidylethanolamine (PE) and plasmeyl PE (pPE) species evaluated in arterial intima tissue and ECs using electrospray ionization mass spectrometry.

**Supplemental Table 4**

|                         | <b>All Patients<br/>N = 31</b> | <b>Non-Diabetic<br/>N = 18</b> | <b>Diabetes<br/>N = 13</b> | <b>P value</b> |
|-------------------------|--------------------------------|--------------------------------|----------------------------|----------------|
| <b>Gender</b>           |                                |                                |                            |                |
| Male                    | 67.7%                          | 66.7%                          | 61.5%                      | 0.54           |
| Female                  | 32.3%                          | 33.3%                          | 38.5%                      |                |
| <b>Age (years)</b>      |                                |                                |                            |                |
| 55-64                   | 41.9%                          | 53.8%                          | 27.8%                      | 0.27           |
| 65-74                   | 38.7%                          | 23.1%                          | 50%                        | 0.13           |
| >75                     | 19.4%                          | 23.1%                          | 22.2%                      | 0.67           |
| <b>Smoking</b>          |                                |                                |                            |                |
| Never                   | 16.1%                          | 7.7%                           | 22.2%                      | 0.29           |
| Former §                | 51.6%                          | 53.8%                          | 50.0%                      | 0.84           |
| Current                 | 32.3%                          | 38.5%                          | 22.2%                      | 0.55           |
| <b>Co-Morbidities</b>   |                                |                                |                            |                |
| Hyperlipidemia          | 74.2%                          | 69.2%                          | 77.8%                      | 0.61           |
| Hypertension            | 90.3%                          | 100%                           | 77.8%                      | 0.13           |
| Coronary Artery Disease | 41.9%                          | 53.8%                          | 33.3%                      | 0.27           |
| Cerebrovascular Disease | 29.0%                          | 30.8%                          | 22.2%                      | 0.86           |
| <b>Medications</b>      |                                |                                |                            |                |
| Statin                  | 71.0%                          | 72.2%                          | 69.2%                      | 0.86           |
| Insulin                 | 25.8%                          | 0%                             | 61.5%                      | <0.001         |

§ Former smoking was reported as smoking > 1 year prior to recruitment

Supplemental Table 4: Demographics of 31 patients (18 non-diabetic, and 13 diabetic) with severe peripheral arterial disease who were enrolled in institutional biobank to collect peripheral arterial segments for molecular and biochemical analysis.

**Supplemental Table 5**

| Diabetes Status  | No Diabetes |        |      |        | Diabetes |        |      |        |
|------------------|-------------|--------|------|--------|----------|--------|------|--------|
| Arterial Segment | Max         |        | Min  |        | Max      |        | Min  |        |
| Gender           | Male        | Female | Male | Female | Male     | Female | Male | Female |
| # of Patients    | 11          | 4      | 12   | 5      | 4        | 3      | 4    | 4      |
| Average          | 0.64        | 0.78   | 0.71 | 0.74   | 0.81     | 0.90   | 0.90 | 0.90   |
| SEM              | 0.04        | 0.06   | 0.03 | 0.06   | 0.08     | 0.03   | 0.10 | 0.04   |
| P value          |             | 0.09   |      | 0.61   |          | 0.36   |      | 0.98   |

SEM , Standard Error of the Mean

Supplemental Table 5: Max and Min arterial intima specimens from both patients with or without diabetes, and male and female. No differences were observed in *cept1* gene expression relative to patient gender.

### Supplemental Table 6

| Genotype          | <i>Cept1Lp/Lp Cre-</i> |        | <i>Cept1Lp/Lp Cre+</i> |        | <i>Cept1Lp/Lp Cre-</i> |        | <i>Cept1Lp/Lp Cre+</i> |        |
|-------------------|------------------------|--------|------------------------|--------|------------------------|--------|------------------------|--------|
|                   | Male                   | Female | Male                   | Female | Male                   | Female | Male                   | Female |
| # of Mice         | 4                      | 3      | 6                      | 4      | 12                     | 2      | 8                      | 2      |
| Doppler Perfusion | 0.83                   | 0.49   | 0.49                   | 0.46   | 0.58                   | 0.40   | 0.50                   | 0.22   |
| SEM               | 0.10                   | 0.06   | 0.12                   | 0.16   | 0.05                   | 0.04   | 0.05                   | 0.07   |
| <i>P</i> value    |                        | 0.09   |                        | 0.86   |                        | 0.23   |                        | 0.08   |

SEM , Standard Error of the Mean

Supplemental Table 6: Both male and female mice sexes were evaluated in hind-limb ischemia experiments, and no significant differences were observed in the Doppler perfusion relative to mouse sex.
